# Supplementary material for: Inheritance through the cytoplasm
Source: PubMed Central journal article supplement (PMC9273588; doi:10.1038/s41437-022-00540-2), 2022-05-07
Supplement: 41437_2022_540_MOESM1_ESM.pdf [file 41437_2022_540_MOESM1_ESM.pdf]

Table S1. List of taxa that display evidence of non-maternal inheritance of mitochondria or chloroplast DNA.

| Inheritance Pattern    | Cytoplasmic Element | Taxonomic Group | Species Name (common name)                              | Reference                                                                                                                                                                                                                                                 |
|------------------------|---------------------|-----------------|---------------------------------------------------------|-----------------------------------------------------------------------------------------------------------------------------------------------------------------------------------------------------------------------------------------------------------|
| Biparental Inheritance | Mitochondria        | Animals         | <i>Carassius auratus x Cyprinus carpio allotriploid</i> | Guo, X., Liu, S., & Liu, Y. (2006). Evidence for recombination of mitochondrial DNA in triploid crucian carp. <i>Genetics</i> , 172(3), 1745-1749.                                                                                                        |
| Biparental Inheritance | Mitochondria        | Animals         | <i>Engraulis encrasicolus (anchovy)</i>                 | Magoulas, A., & Zouros, E. (1993). Restriction-site heteroplasmy in anchovy ( <i>Engraulis encrasicolus</i> ) indicates incidental biparental inheritance of mitochondrial DNA.                                                                           |
| Biparental Inheritance | Mitochondria        | Animals         | <i>Schistosoma mansoni</i>                              | Jannotti-Passos, L. K., Souza, C. P., Parra, J. C., & Simpson, A. J. G. (2001). Biparental mitochondrial DNA inheritance in the parasitic trematode <i>Schistosoma mansoni</i> . <i>Journal of Parasitology</i> , 87(1), 79-82.                           |
| DUI                    | Mitochondria        | Animals         | <i>Actinonaias ligamentina</i>                          | Hoeh, W. R., Stewart, D. T., & Guttman, S. I. (2002). High fidelity of mitochondrial genome transmission under the doubly uniparental mode of inheritance in freshwater mussels (Bivalvia: Unionoidea). <i>Evolution</i> , 56(11), 2252-2261.             |
| DUI                    | Mitochondria        | Animals         | <i>Amblema plicata</i>                                  | Curole, J. P., & Kocher, T. D. (2005). Evolution of a unique mitotype-specific protein-coding extension of the cytochrome c oxidase II gene in freshwater mussels (Bivalvia: Unionoidea). <i>Journal of Molecular Evolution</i> , 61(3), 381-389.         |
| DUI                    | Mitochondria        | Animals         | <i>Anodonta anatina</i>                                 | Soroka, M. (2010). Characteristics of mitochondrial DNA of unionid bivalves (Mollusca: Bivalvia: Unionidae). I. Detection and characteristics of doubly uniparental inheritance (DUI) of unionid mitochondrial DNA. <i>Folia malacologica</i> , 18(4).    |
| DUI                    | Mitochondria        | Animals         | <i>Anodonta californensis</i>                           | Mock, K. E., Brim-Box, J. C., Miller, M. P., Downing, M. E., & Hoeh, W. R. (2004). Genetic diversity and divergence among freshwater mussel ( <i>Anodonta</i> ) populations in the Bonneville Basin of Utah. <i>Molecular Ecology</i> , 13(5), 1085-1098. |
| DUI                    | Mitochondria        | Animals         | <i>Anodonta implicata</i>                               | Curole, J. P., & Kocher, T. D. (2002). Ancient sex-specific extension of the cytochrome c oxidase II gene in bivalves and the fidelity of doubly-uniparental inheritance. <i>Molecular Biology and Evolution</i> , 19(8), 1323-1328.                      |
| DUI                    | Mitochondria        | Animals         | <i>Anodonta oregonensis</i>                             | Mock, K. E., Brim-Box, J. C., Miller, M. P., Downing, M. E., & Hoeh, W. R. (2004). Genetic diversity and divergence among freshwater mussel ( <i>Anodonta</i> ) populations in the Bonneville Basin of Utah. <i>Molecular Ecology</i> , 13(5), 1085-1098. |
| DUI                    | Mitochondria        | Animals         | <i>Anodonta wahlamatensis</i>                           | Mock, K. E., Brim-Box, J. C., Miller, M. P., Downing, M. E., & Hoeh, W. R. (2004). Genetic diversity and divergence among freshwater mussel ( <i>Anodonta</i> ) populations in the Bonneville Basin of Utah. <i>Molecular Ecology</i> , 13(5), 1085-1098. |
| DUI                    | Mitochondria        | Animals         | <i>Anodonta woodiana</i>                                | Soroka, M. (2008). Doubly uniparental inheritance of mitochondrial DNA in the freshwater bivalve <i>Anodonta woodiana</i> (Bivalvia: Unionidae). <i>Folia Biologica (Krakow)</i> , 56(1-2), 91-95.                                                        |
| DUI                    | Mitochondria        | Animals         | <i>Arctica islandica</i>                                | Dégletagne, C., Abele, D., & Held, C. (2016). A distinct mitochondrial genome with DUI-like inheritance in the ocean quahog <i>Arctica islandica</i> . <i>Molecular biology and evolution</i> , 33(2), 375-383.                                           |
| DUI                    | Mitochondria        | Animals         | <i>Brachidontes exustus</i>                             | Lee, T., & Ó FOIGHIL, D. (2004). Hidden Floridian biodiversity: mitochondrial and nuclear gene trees reveal four cryptic species within the scorched mussel, <i>Brachidontes exustus</i> , species complex. <i>Molecular Ecology</i> , 13(11), 3527-3542. |

|     |              |         |                                |                                                                                                                                                                                                                                                                                                                        |
|-----|--------------|---------|--------------------------------|------------------------------------------------------------------------------------------------------------------------------------------------------------------------------------------------------------------------------------------------------------------------------------------------------------------------|
| DUI | Mitochondria | Animals | <i>Brachidontes pharaonis</i>  | Lee, T., & Ó FOIGHIL, D. (2004). Hidden Floridian biodiversity: mitochondrial and nuclear gene trees reveal four cryptic species within the scorched mussel, <i>Brachidontes exustus</i> , species complex. <i>Molecular Ecology</i> , 13(11), 3527-3542.                                                              |
| DUI | Mitochondria | Animals | <i>Brachidontes variabilis</i> | Terranova, M. S., Lo Brutto, S., Arculeo, M., & Mitton, J. B. (2007). A mitochondrial phylogeography of <i>Brachidontes variabilis</i> (Bivalvia: Mytilidae) reveals three cryptic species. <i>Journal of Zoological Systematics and Evolutionary Research</i> , 45(4), 289-298.                                       |
| DUI | Mitochondria | Animals | <i>Cumberlandia monodonta</i>  | Breton, S., Stewart, D. T., Shepardson, S., Trdan, R. J., Bogan, A. E., Chapman, E. G., ... & Hoeh, W. R. (2011). Novel protein genes in animal mtDNA: a new sex determination system in freshwater mussels (Bivalvia: Unionoida)? <i>Molecular Biology and Evolution</i> , 28(5), 1645-1659.                          |
| DUI | Mitochondria | Animals | <i>Cyclina sinensis</i>        | AB040833, AB040834                                                                                                                                                                                                                                                                                                     |
| DUI | Mitochondria | Animals | <i>Cyprogenia alberti</i>      | Walker, J. M., Curole, J. P., Wade, D. E., Chapman, E. G., Bogan, A. E., Watters, G. T., & Hoeh, W. R. (2006). Taxonomic distribution and phylogenetic utility of gender-associated mitochondrial genomes in the Unionoida (Bivalvia). <i>MALACOLOGIA-PHILADELPHIA</i> , 48(1/2), 265.                                 |
| DUI | Mitochondria | Animals | <i>Cyrtonaias tampicoensis</i> | Hoeh, W. R., Stewart, D. T., & Guttman, S. I. (2002). High fidelity of mitochondrial genome transmission under the doubly uniparental mode of inheritance in freshwater mussels (Bivalvia: Unionoidea). <i>Evolution</i> , 56(11), 2252-2261.                                                                          |
| DUI | Mitochondria | Animals | <i>Dahurinaia dahurica</i>     | Walker, J. M., Curole, J. P., Wade, D. E., Chapman, E. G., Bogan, A. E., Watters, G. T., & Hoeh, W. R. (2006). Taxonomic distribution and phylogenetic utility of gender-associated mitochondrial genomes in the Unionoida (Bivalvia). <i>MALACOLOGIA-PHILADELPHIA</i> , 48(1/2), 265.                                 |
| DUI | Mitochondria | Animals | <i>Donax cuneatus</i>          | AB040841, AB040842                                                                                                                                                                                                                                                                                                     |
| DUI | Mitochondria | Animals | <i>Donax faba</i>              | AB040843, AB040844                                                                                                                                                                                                                                                                                                     |
| DUI | Mitochondria | Animals | <i>Donax trunculus</i>         | Theologidis, I., Fodelianakis, S., Gaspar, M. B., & Zouros, E. (2008). Doubly uniparental inheritance (DUI) of mitochondrial DNA in <i>Donax trunculus</i> (Bivalvia: Donacidae) and the problem of its sporadic detection in Bivalvia. <i>Evolution: International Journal of Organic Evolution</i> , 62(4), 959-970. |
| DUI | Mitochondria | Animals | <i>Dromus dromas</i>           | Walker, J. M., Curole, J. P., Wade, D. E., Chapman, E. G., Bogan, A. E., Watters, G. T., & Hoeh, W. R. (2006). Taxonomic distribution and phylogenetic utility of gender-associated mitochondrial genomes in the Unionoida (Bivalvia). <i>MALACOLOGIA-PHILADELPHIA</i> , 48(1/2), 265.                                 |
| DUI | Mitochondria | Animals | <i>Ellipsaria lineolata</i>    | Walker, J. M., Curole, J. P., Wade, D. E., Chapman, E. G., Bogan, A. E., Watters, G. T., & Hoeh, W. R. (2006). Taxonomic distribution and phylogenetic utility of gender-associated mitochondrial genomes in the Unionoida (Bivalvia). <i>MALACOLOGIA-PHILADELPHIA</i> , 48(1/2), 265.                                 |
| DUI | Mitochondria | Animals | <i>Elliptio dilitata</i>       | Walker, J. M., Curole, J. P., Wade, D. E., Chapman, E. G., Bogan, A. E., Watters, G. T., & Hoeh, W. R. (2006). Taxonomic distribution and phylogenetic utility of gender-associated mitochondrial genomes in the Unionoida (Bivalvia). <i>MALACOLOGIA-PHILADELPHIA</i> , 48(1/2), 265.                                 |

|     |              |         |                               |                                                                                                                                                                                                                                                                                                                                                                                                                                  |
|-----|--------------|---------|-------------------------------|----------------------------------------------------------------------------------------------------------------------------------------------------------------------------------------------------------------------------------------------------------------------------------------------------------------------------------------------------------------------------------------------------------------------------------|
| DUI | Mitochondria | Animals | <i>Epioblasma brevidens</i>   | Walker, J. M., Curole, J. P., Wade, D. E., Chapman, E. G., Bogan, A. E., Watters, G. T., & Hoeh, W. R. (2006). Taxonomic distribution and phylogenetic utility of gender-associated mitochondrial genomes in the Unionoidea (Bivalvia). <i>MALACOLOGIA-PHILADELPHIA</i> , <i>48</i> (1/2), 265.                                                                                                                                  |
| DUI | Mitochondria | Animals | <i>Fusconaia flava</i>        | Hoeh, W. R., Stewart, D. T., Sutherland, B. W., & Zouros, E. (1996). Multiple origins of gender-associated mitochondrial DNA lineages in bivalves (Mollusca: Bivalvia). <i>Evolution</i> , <i>50</i> (6), 2276-2286.                                                                                                                                                                                                             |
| DUI | Mitochondria | Animals | <i>Geukensia demissa</i>      | Hoeh, W. R., Stewart, D. T., Sutherland, B. W., & Zouros, E. (1996). Multiple origins of gender-associated mitochondrial DNA lineages in bivalves (Mollusca: Bivalvia). <i>Evolution</i> , <i>50</i> (6), 2276-2286.                                                                                                                                                                                                             |
| DUI | Mitochondria | Animals | <i>Glebulula rotundata</i>    | Curole, J. P., & Kocher, T. D. (2005). Evolution of a unique mitotype-specific protein-coding extension of the cytochrome c oxidase II gene in freshwater mussels (Bivalvia: Unionoidea). <i>Journal of Molecular Evolution</i> , <i>61</i> (3), 381-389.                                                                                                                                                                        |
| DUI | Mitochondria | Animals | <i>Gonidea angulata</i>       | Walker, J. M., Curole, J. P., Wade, D. E., Chapman, E. G., Bogan, A. E., Watters, G. T., & Hoeh, W. R. (2006). Taxonomic distribution and phylogenetic utility of gender-associated mitochondrial genomes in the Unionoidea (Bivalvia). <i>MALACOLOGIA-PHILADELPHIA</i> , <i>48</i> (1/2), 265.                                                                                                                                  |
| DUI | Mitochondria | Animals | <i>Hamiota subangulata</i>    | Chapman, E. G., Piontkivska, H., Walker, J. M., Stewart, D. T., Curole, J. P., & Hoeh, W. R. (2008). Extreme primary and secondary protein structure variability in the chimeric male-transmitted cytochrome c oxidase subunit II protein in freshwater mussels: Evidence for an elevated amino acid substitution rate in the face of domain-specific purifying selection. <i>BMC Evolutionary Biology</i> , <i>8</i> (1), 1-16. |
| DUI | Mitochondria | Animals | <i>Hyridella menziesi</i>     | Hoeh, W. R., Stewart, D. T., & Guttman, S. I. (2002). High fidelity of mitochondrial genome transmission under the doubly uniparental mode of inheritance in freshwater mussels (Bivalvia: Unionoidea). <i>Evolution</i> , <i>56</i> (11), 2252-2261.                                                                                                                                                                            |
| DUI | Mitochondria | Animals | <i>Hyriopsis cumingii</i>     | <a href="#">KC471519</a>                                                                                                                                                                                                                                                                                                                                                                                                         |
| DUI | Mitochondria | Animals | <i>Hyriopsis schlegelii</i>   | Fukata, Y., & Iigo, M. (2020). F-type complete mitochondrial genomes of two Hyriopsis species, <i>H. schlegelii</i> and <i>H. cumingii</i> (Bivalvia; Unionoidea; Unionidae) from Lake Kasumigaura, Japan, and its phylogenetic analysis. <i>Mitochondrial DNA Part B</i> , <i>5</i> (2), 1218-1219.                                                                                                                             |
| DUI | Mitochondria | Animals | <i>Inversidens japonensis</i> | Doucet-Beaupré, H., Breton, S., Chapman, E. G., Blier, P. U., Bogan, A. E., Stewart, D. T., & Hoeh, W. R. (2010). Mitochondrial phylogenomics of the Bivalvia (Mollusca): searching for the origin and mitogenomic correlates of doubly uniparental inheritance of mtDNA. <i>BMC Evolutionary Biology</i> , <i>10</i> (1), 1-19.                                                                                                 |
| DUI | Mitochondria | Animals | <i>Lamprotula leai</i>        | Zieritz, A., Froufe, E., Bolotov, I., Gonçalves, D. V., Aldridge, D. C., Bogan, A. E., ... & Lopes-Lima, M. (2021). Mitogenomic phylogeny and fossil-calibrated mutation rates for all F- and M-type mtDNA genes of the largest freshwater mussel family, the Unionidae (Bivalvia). <i>Zoological Journal of the Linnean Society</i> , <i>193</i> (3), 1088-1107.                                                                |
| DUI | Mitochondria | Animals | <i>Lamprotula tortuosa</i>    | Wang, G., Cao, X., & Li, J. (2013). Complete F-type mitochondrial genome of Chinese freshwater mussel <i>Lamprotula tortuosa</i> . <i>Mitochondrial DNA</i> , <i>24</i> (5), 513-515.                                                                                                                                                                                                                                            |

|     |              |         |                              |                                                                                                                                                                                                                                                                                                                                                                                                                          |
|-----|--------------|---------|------------------------------|--------------------------------------------------------------------------------------------------------------------------------------------------------------------------------------------------------------------------------------------------------------------------------------------------------------------------------------------------------------------------------------------------------------------------|
| DUI | Mitochondria | Animals | <i>Lampsilis cardium</i>     | Walker, J. M., Curole, J. P., Wade, D. E., Chapman, E. G., Bogan, A. E., Watters, G. T., & Hoeh, W. R. (2006). Taxonomic distribution and phylogenetic utility of gender-associated mitochondrial genomes in the Unionoida (Bivalvia). <i>MALACOLOGIA-PHILADELPHIA</i> , 48(1/2), 265.                                                                                                                                   |
| DUI | Mitochondria | Animals | <i>Lampsilis hydiana</i>     | Walker, J. M., Curole, J. P., Wade, D. E., Chapman, E. G., Bogan, A. E., Watters, G. T., & Hoeh, W. R. (2006). Taxonomic distribution and phylogenetic utility of gender-associated mitochondrial genomes in the Unionoida (Bivalvia). <i>MALACOLOGIA-PHILADELPHIA</i> , 48(1/2), 265.                                                                                                                                   |
| DUI | Mitochondria | Animals | <i>Lampsilis ovata</i>       | Chapman, E. G., Piontkivska, H., Walker, J. M., Stewart, D. T., Curole, J. P., & Hoeh, W. R. (2008). Extreme primary and secondary protein structure variability in the chimeric male-transmitted cytochrome c oxidase subunit II protein in freshwater mussels: Evidence for an elevated amino acid substitution rate in the face of domain-specific purifying selection. <i>BMC Evolutionary Biology</i> , 8(1), 1-16. |
| DUI | Mitochondria | Animals | <i>Lampsilis powellii</i>    | Walker, J. M., Curole, J. P., Wade, D. E., Chapman, E. G., Bogan, A. E., Watters, G. T., & Hoeh, W. R. (2006). Taxonomic distribution and phylogenetic utility of gender-associated mitochondrial genomes in the Unionoida (Bivalvia). <i>MALACOLOGIA-PHILADELPHIA</i> , 48(1/2), 265.                                                                                                                                   |
| DUI | Mitochondria | Animals | <i>Lampsilis reeveiana</i>   | Walker, J. M., Curole, J. P., Wade, D. E., Chapman, E. G., Bogan, A. E., Watters, G. T., & Hoeh, W. R. (2006). Taxonomic distribution and phylogenetic utility of gender-associated mitochondrial genomes in the Unionoida (Bivalvia). <i>MALACOLOGIA-PHILADELPHIA</i> , 48(1/2), 265.                                                                                                                                   |
| DUI | Mitochondria | Animals | <i>Lampsilis siliquoidea</i> | Walker, J. M., Curole, J. P., Wade, D. E., Chapman, E. G., Bogan, A. E., Watters, G. T., & Hoeh, W. R. (2006). Taxonomic distribution and phylogenetic utility of gender-associated mitochondrial genomes in the Unionoida (Bivalvia). <i>MALACOLOGIA-PHILADELPHIA</i> , 48(1/2), 265.                                                                                                                                   |
| DUI | Mitochondria | Animals | <i>Lampsilis straminea</i>   | Curole, J. P., & Kocher, T. D. (2002). Ancient sex-specific extension of the cytochrome c oxidase II gene in bivalves and the fidelity of doubly-uniparental inheritance. <i>Molecular Biology and Evolution</i> , 19(8), 1323-1328.                                                                                                                                                                                     |
| DUI | Mitochondria | Animals | <i>Lampsilis streckeri</i>   | Walker, J. M., Curole, J. P., Wade, D. E., Chapman, E. G., Bogan, A. E., Watters, G. T., & Hoeh, W. R. (2006). Taxonomic distribution and phylogenetic utility of gender-associated mitochondrial genomes in the Unionoida (Bivalvia). <i>MALACOLOGIA-PHILADELPHIA</i> , 48(1/2), 265.                                                                                                                                   |
| DUI | Mitochondria | Animals | <i>Lampsilis teres</i>       | Hoeh, W. R., Stewart, D. T., & Guttman, S. I. (2002). High fidelity of mitochondrial genome transmission under the doubly uniparental mode of inheritance in freshwater mussels (Bivalvia: Unionioidea). <i>Evolution</i> , 56(11), 2252-2261.                                                                                                                                                                           |
| DUI | Mitochondria | Animals | <i>Lanceolaria grayana</i>   | AB040829, AB040830                                                                                                                                                                                                                                                                                                                                                                                                       |
| DUI | Mitochondria | Animals | <i>Lasmigona complanata</i>  | Stewart, D. T., Hoeh, W. R., Bauer, G., & Breton, S. (2013). Mitochondrial genes, sex determination and hermaphroditism in freshwater mussels (Bivalvia: Unionoida). In <i>Evolutionary biology: exobiology and evolutionary mechanisms</i> (pp. 245-255). Springer, Berlin, Heidelberg.                                                                                                                                 |

|     |              |         |                                    |                                                                                                                                                                                                                                                                                                                                                                                                                          |
|-----|--------------|---------|------------------------------------|--------------------------------------------------------------------------------------------------------------------------------------------------------------------------------------------------------------------------------------------------------------------------------------------------------------------------------------------------------------------------------------------------------------------------|
| DUI | Mitochondria | Animals | <i>Lasmigona costata</i>           | Stewart, D. T., Hoeh, W. R., Bauer, G., & Breton, S. (2013). Mitochondrial genes, sex determination and hermaphroditism in freshwater mussels (Bivalvia: Unionoida). In <i>Evolutionary biology: exobiology and evolutionary mechanisms</i> (pp. 245-255). Springer, Berlin, Heidelberg.                                                                                                                                 |
| DUI | Mitochondria | Animals | <i>Ledella sublevis</i>            | Boyle, E. E., & Etter, R. J. (2013). Heteroplasmy in a deep-sea protobranch bivalve suggests an ancient origin of doubly uniparental inheritance of mitochondria in Bivalvia. <i>Marine Biology</i> , 160(2), 413-422.                                                                                                                                                                                                   |
| DUI | Mitochondria | Animals | <i>Ledella ultima</i>              | Boyle, E. E., & Etter, R. J. (2013). Heteroplasmy in a deep-sea protobranch bivalve suggests an ancient origin of doubly uniparental inheritance of mitochondria in Bivalvia. <i>Marine Biology</i> , 160(2), 413-422.                                                                                                                                                                                                   |
| DUI | Mitochondria | Animals | <i>Lemiox rimosus</i>              | Chapman, E. G., Piontkivska, H., Walker, J. M., Stewart, D. T., Curole, J. P., & Hoeh, W. R. (2008). Extreme primary and secondary protein structure variability in the chimeric male-transmitted cytochrome c oxidase subunit II protein in freshwater mussels: Evidence for an elevated amino acid substitution rate in the face of domain-specific purifying selection. <i>BMC Evolutionary Biology</i> , 8(1), 1-16. |
| DUI | Mitochondria | Animals | <i>Leptodea fragilis</i>           | Walker, J. M., Curole, J. P., Wade, D. E., Chapman, E. G., Bogan, A. E., Watters, G. T., & Hoeh, W. R. (2006). Taxonomic distribution and phylogenetic utility of gender-associated mitochondrial genomes in the Unionoida (Bivalvia). <i>MALACOLOGIA-PHILADELPHIA</i> , 48(1/2), 265.                                                                                                                                   |
| DUI | Mitochondria | Animals | <i>Leptodea leptodon</i>           | Walker, J. M., Curole, J. P., Wade, D. E., Chapman, E. G., Bogan, A. E., Watters, G. T., & Hoeh, W. R. (2006). Taxonomic distribution and phylogenetic utility of gender-associated mitochondrial genomes in the Unionoida (Bivalvia). <i>MALACOLOGIA-PHILADELPHIA</i> , 48(1/2), 265.                                                                                                                                   |
| DUI | Mitochondria | Animals | <i>Ligumia recta</i>               | Hoeh, W. R., Stewart, D. T., & Guttman, S. I. (2002). High fidelity of mitochondrial genome transmission under the doubly uniparental mode of inheritance in freshwater mussels (Bivalvia: Unionoidea). <i>Evolution</i> , 56(11), 2252-2261.                                                                                                                                                                            |
| DUI | Mitochondria | Animals | <i>Limecola balthica</i>           | Capt, C., Bouvet, K., Guerra, D., Robicheau, B. M., Stewart, D. T., Pante, E., & Breton, S. (2020). Unorthodox features in two venerid bivalves with doubly uniparental inheritance of mitochondria. <i>Scientific reports</i> , 10(1), 1-13.                                                                                                                                                                            |
| DUI | Mitochondria | Animals | <i>Margaritifera hembeli</i>       | Curole, J. P., & Kocher, T. D. (2005). Evolution of a unique mitotype-specific protein-coding extension of the cytochrome c oxidase II gene in freshwater mussels (Bivalvia: Unionoida). <i>Journal of Molecular Evolution</i> , 61(3), 381-389.                                                                                                                                                                         |
| DUI | Mitochondria | Animals | <i>Margaritifera margaritifera</i> | Hoeh, W. R., Stewart, D. T., & Guttman, S. I. (2002). High fidelity of mitochondrial genome transmission under the doubly uniparental mode of inheritance in freshwater mussels (Bivalvia: Unionoidea). <i>Evolution</i> , 56(11), 2252-2261.                                                                                                                                                                            |
| DUI | Mitochondria | Animals | <i>Margaritifera marrianae</i>     | Stewart, D. T., Hoeh, W. R., Bauer, G., & Breton, S. (2013). Mitochondrial genes, sex determination and hermaphroditism in freshwater mussels (Bivalvia: Unionoida). In <i>Evolutionary biology: exobiology and evolutionary mechanisms</i> (pp. 245-255). Springer, Berlin, Heidelberg.                                                                                                                                 |
| DUI | Mitochondria | Animals | <i>Medionidus conradicus</i>       | Walker, J. M., Curole, J. P., Wade, D. E., Chapman, E. G., Bogan, A. E., Watters, G. T., & Hoeh, W. R. (2006). Taxonomic distribution and phylogenetic utility of gender-associated mitochondrial genomes in the Unionoida (Bivalvia). <i>MALACOLOGIA-PHILADELPHIA</i> , 48(1/2), 265.                                                                                                                                   |

|     |              |         |                                               |                                                                                                                                                                                                                                                                                                                                                                                                                          |
|-----|--------------|---------|-----------------------------------------------|--------------------------------------------------------------------------------------------------------------------------------------------------------------------------------------------------------------------------------------------------------------------------------------------------------------------------------------------------------------------------------------------------------------------------|
| DUI | Mitochondria | Animals | <i>Meretrix Lamarckii</i>                     | Plazzi, F., Cassano, A., & Passamonti, M. (2015). The quest for Doubly Uniparental Inheritance in heterodont bivalves and its detection in <i>Meretrix lamarckii</i> (Veneridae: Meretricinae). <i>Journal of Zoological Systematics and Evolutionary Research</i> , 53(1), 87-94.                                                                                                                                       |
| DUI | Mitochondria | Animals | <i>Modiolus modiolus Musculista senhousia</i> | Robicheau, B. M., Breton, S., & Stewart, D. T. (2017). Sequence motifs associated with paternal transmission of mitochondrial DNA in the horse mussel, <i>Modiolus modiolus</i> (Bivalvia: Mytilidae). <i>Gene</i> , 605, 32-42.                                                                                                                                                                                         |
| DUI | Mitochondria | Animals | <i>Mytella charuana</i>                       | Alves, F. A., Beasley, C. R., Hoeh, W. R., da Rocha, R. M., Simone, L. R., & Tagliaro, C. H. (2012). Detection of mitochondrial DNA heteroplasmy suggests a doubly uniparental inheritance pattern in the mussel <i>Mytella charruana</i> . <i>Revista Brasileira de Biociências</i> , 10(2), 176.                                                                                                                       |
| DUI | Mitochondria | Animals | <i>Mytilus californianus</i>                  | Beagley, C. T., Taylor, K. A., & Wolstenholme, D. R. (1997). Gender-associated diverse mitochondrial DNA molecules of the mussel <i>Mytilus californianus</i> . <i>Current genetics</i> , 31(4), 318-324.                                                                                                                                                                                                                |
| DUI | Mitochondria | Animals | <i>Mytilus coruscus</i>                       | Breton, S., Ghiselli, F., Passamonti, M., Milani, L., Stewart, D. T., & Hoeh, W. R. (2011). Evidence for a fourteenth mtDNA-encoded protein in the female-transmitted mtDNA of marine mussels (Bivalvia: Mytilidae). <i>PLoS One</i> , 6(4), e19365.                                                                                                                                                                     |
| DUI | Mitochondria | Animals | <i>Mytilus edulis</i>                         | Zouros, E., Ball, A. O., Saavedra, C., & Freeman, K. R. (1994). An unusual type of mitochondrial DNA inheritance in the blue mussel <i>Mytilus</i> . <i>Proceedings of the National Academy of Sciences</i> , 91(16), 7463-7467.                                                                                                                                                                                         |
| DUI | Mitochondria | Animals | <i>Mytilus edulis</i> (blue mussel)           | Skibinski, D. O., Gallagher, C., & Beynon, C. (1994). Sex-limited mitochondrial DNA transmission in the marine mussel <i>Mytilus edulis</i> . <i>Genetics</i> , 138(3), 801-809.                                                                                                                                                                                                                                         |
| DUI | Mitochondria | Animals | <i>Mytilus galloprovincialis</i>              | Quesada, H., Skibinski, D. A., & Skibinski, D. O. (1996). Sex-biased heteroplasmy and mitochondrial DNA inheritance in the mussel <i>Mytilus galloprovincialis</i> Lmk. <i>Current genetics</i> , 29(5), 423-426.                                                                                                                                                                                                        |
| DUI | Mitochondria | Animals | <i>Mytilus trossulus</i>                      | Zouros, E., Ball, A. O., Saavedra, C., & Freeman, K. R. (1994). An unusual type of mitochondrial DNA inheritance in the blue mussel <i>Mytilus</i> . <i>Proceedings of the National Academy of Sciences</i> , 91(16), 7463-7467.                                                                                                                                                                                         |
| DUI | Mitochondria | Animals | <i>Obliquaria reflexa</i>                     | Chapman, E. G., Piontkivska, H., Walker, J. M., Stewart, D. T., Curole, J. P., & Hoeh, W. R. (2008). Extreme primary and secondary protein structure variability in the chimeric male-transmitted cytochrome c oxidase subunit II protein in freshwater mussels: Evidence for an elevated amino acid substitution rate in the face of domain-specific purifying selection. <i>BMC Evolutionary Biology</i> , 8(1), 1-16. |
| DUI | Mitochondria | Animals | <i>Obovaria olivaria</i>                      | Walker, J. M., Curole, J. P., Wade, D. E., Chapman, E. G., Bogan, A. E., Watters, G. T., & Hoeh, W. R. (2006). Taxonomic distribution and phylogenetic utility of gender-associated mitochondrial genomes in the Unionoida (Bivalvia). <i>MALACOLOGIA-PHILADELPHIA</i> , 48(1/2), 265.                                                                                                                                   |
| DUI | Mitochondria | Animals | <i>Perumytilus purpuratus</i>                 | Vargas, J., Pérez, M., Toro, J., & Astorga, M. P. (2015). Presence of two mitochondrial genomes in the mytilid <i>Perumytilus purpuratus</i> : phylogenetic evidence for doubly uniparental inheritance. <i>Genetics and molecular biology</i> , 38, 173-181.                                                                                                                                                            |
| DUI | Mitochondria | Animals | <i>Plectomerus dombeyanus</i>                 | Curole, J. P., & Kocher, T. D. (2005). Evolution of a unique mitotype-specific protein-coding extension of the cytochrome c oxidase II gene in freshwater mussels (Bivalvia: Unionoida). <i>Journal of Molecular Evolution</i> , 61(3), 381-389.                                                                                                                                                                         |

|     |              |         |                                   |                                                                                                                                                                                                                                                                                                                                                                                                                          |
|-----|--------------|---------|-----------------------------------|--------------------------------------------------------------------------------------------------------------------------------------------------------------------------------------------------------------------------------------------------------------------------------------------------------------------------------------------------------------------------------------------------------------------------|
| DUI | Mitochondria | Animals | <i>Pleurobema sintoxia</i>        | Chapman, E. G., Piontkivska, H., Walker, J. M., Stewart, D. T., Curole, J. P., & Hoeh, W. R. (2008). Extreme primary and secondary protein structure variability in the chimeric male-transmitted cytochrome c oxidase subunit II protein in freshwater mussels: Evidence for an elevated amino acid substitution rate in the face of domain-specific purifying selection. <i>BMC Evolutionary Biology</i> , 8(1), 1-16. |
| DUI | Mitochondria | Animals | <i>Popenaias popeii</i>           | Walker, J. M., Curole, J. P., Wade, D. E., Chapman, E. G., Bogan, A. E., Watters, G. T., & Hoeh, W. R. (2006). Taxonomic distribution and phylogenetic utility of gender-associated mitochondrial genomes in the Unionoida (Bivalvia). <i>MALACOLOGIA-PHILADELPHIA</i> , 48(1/2), 265.                                                                                                                                   |
| DUI | Mitochondria | Animals | <i>Potamilus alatus</i>           | Walker, J. M., Curole, J. P., Wade, D. E., Chapman, E. G., Bogan, A. E., Watters, G. T., & Hoeh, W. R. (2006). Taxonomic distribution and phylogenetic utility of gender-associated mitochondrial genomes in the Unionoida (Bivalvia). <i>MALACOLOGIA-PHILADELPHIA</i> , 48(1/2), 265.                                                                                                                                   |
| DUI | Mitochondria | Animals | <i>Potamilus capax</i>            | Walker, J. M., Curole, J. P., Wade, D. E., Chapman, E. G., Bogan, A. E., Watters, G. T., & Hoeh, W. R. (2006). Taxonomic distribution and phylogenetic utility of gender-associated mitochondrial genomes in the Unionoida (Bivalvia). <i>MALACOLOGIA-PHILADELPHIA</i> , 48(1/2), 265.                                                                                                                                   |
| DUI | Mitochondria | Animals | <i>Potamilus ohioensis</i>        | Walker, J. M., Curole, J. P., Wade, D. E., Chapman, E. G., Bogan, A. E., Watters, G. T., & Hoeh, W. R. (2006). Taxonomic distribution and phylogenetic utility of gender-associated mitochondrial genomes in the Unionoida (Bivalvia). <i>MALACOLOGIA-PHILADELPHIA</i> , 48(1/2), 265.                                                                                                                                   |
| DUI | Mitochondria | Animals | <i>Potamilus purpuratus</i>       | Hoeh, W. R., Stewart, D. T., & Guttman, S. I. (2002). High fidelity of mitochondrial genome transmission under the doubly uniparental mode of inheritance in freshwater mussels (Bivalvia: Unionoidea). <i>Evolution</i> , 56(11), 2252-2261.                                                                                                                                                                            |
| DUI | Mitochondria | Animals | <i>Pseudocardium sachalinense</i> | Plazzi, F. (2015). The detection of sex-linked heteroplasmy in <i>Pseudocardium sachalinense</i> (Bivalvia: Mactridae) and its implications for the distribution of doubly uniparental inheritance of mitochondrial DNA. <i>Journal of Zoological Systematics and Evolutionary Research</i> , 53(3), 205-210.                                                                                                            |
| DUI | Mitochondria | Animals | <i>Pseudodon vondembuschianus</i> | Walker, J. M., Curole, J. P., Wade, D. E., Chapman, E. G., Bogan, A. E., Watters, G. T., & Hoeh, W. R. (2006). Taxonomic distribution and phylogenetic utility of gender-associated mitochondrial genomes in the Unionoida (Bivalvia). <i>MALACOLOGIA-PHILADELPHIA</i> , 48(1/2), 265.                                                                                                                                   |
| DUI | Mitochondria | Animals | <i>Ptychobranthus fasciolaris</i> | Walker, J. M., Curole, J. P., Wade, D. E., Chapman, E. G., Bogan, A. E., Watters, G. T., & Hoeh, W. R. (2006). Taxonomic distribution and phylogenetic utility of gender-associated mitochondrial genomes in the Unionoida (Bivalvia). <i>MALACOLOGIA-PHILADELPHIA</i> , 48(1/2), 265.                                                                                                                                   |
| DUI | Mitochondria | Animals | <i>Pyganodon fragilis</i>         | Hoeh, W. R., Stewart, D. T., Sutherland, B. W., & Zouros, E. (1996). Multiple origins of gender-associated mitochondrial DNA lineages in bivalves (Mollusca: Bivalvia). <i>Evolution</i> , 50(6), 2276-2286.                                                                                                                                                                                                             |
| DUI | Mitochondria | Animals | <i>Pyganodon grandis</i>          | Liu, H. P., Mitton, J. B., & Wu, S. K. (1996). Paternal mitochondrial DNA differentiation far exceeds maternal mitochondrial DNA and allozyme differentiation in the freshwater mussel, <i>Anodonta grandis grandis</i> . <i>Evolution</i> , 952-957.                                                                                                                                                                    |

|     |              |         |                                |                                                                                                                                                                                                                                                                                                                                                                                                                                          |
|-----|--------------|---------|--------------------------------|------------------------------------------------------------------------------------------------------------------------------------------------------------------------------------------------------------------------------------------------------------------------------------------------------------------------------------------------------------------------------------------------------------------------------------------|
| DUI | Mitochondria | Animals | <i>Quadrula quadrula</i>       | Curole, J. P., & Kocher, T. D. (2002). Ancient sex-specific extension of the cytochrome c oxidase II gene in bivalves and the fidelity of doubly-uniparental inheritance. <i>Molecular Biology and Evolution</i> , 19(8), 1323-1328.                                                                                                                                                                                                     |
| DUI | Mitochondria | Animals | <i>Quadrula refulgens</i>      | Curole, J. P., & Kocher, T. D. (2002). Ancient sex-specific extension of the cytochrome c oxidase II gene in bivalves and the fidelity of doubly-uniparental inheritance. <i>Molecular Biology and Evolution</i> , 19(8), 1323-1328.                                                                                                                                                                                                     |
| DUI | Mitochondria | Animals | <i>Ruditapes philippinarum</i> | Ghiselli, F., Milani, L., Chang, P. L., Hedgecock, D., Davis, J. P., Nuzhdin, S. V., & Passamonti, M. (2012). De novo assembly of the Manila clam <i>Ruditapes philippinarum</i> transcriptome provides new insights into expression bias, mitochondrial doubly uniparental inheritance and sex determination. <i>Molecular biology and evolution</i> , 29(2), 771-786.                                                                  |
| DUI | Mitochondria | Animals | <i>Scrobicularia plana</i>     | Gusman, A., Lecomte, S., Stewart, D. T., Passamonti, M., & Breton, S. (2016). Pursuing the quest for better understanding the taxonomic distribution of the system of doubly uniparental inheritance of mtDNA. <i>PeerJ</i> , 4, e2760.                                                                                                                                                                                                  |
| DUI | Mitochondria | Animals | <i>Scrobicularia plana</i>     | Capt, C., Bouvet, K., Guerra, D., Robicheau, B. M., Stewart, D. T., Pante, E., & Breton, S. (2020). Unorthodox features in two venerid bivalves with doubly uniparental inheritance of mitochondria. <i>Scientific reports</i> , 10(1), 1-13.                                                                                                                                                                                            |
| DUI | Mitochondria | Animals | <i>Semimytilus algosus</i>     | Lubošny, M., Przyłucka, A., Śmietanka, B., & Burzyński, A. (2020). <i>Semimytilus algosus</i> : first known hermaphroditic mussel with doubly uniparental inheritance of mitochondrial DNA. <i>Scientific reports</i> , 10(1), 1-12.                                                                                                                                                                                                     |
| DUI | Mitochondria | Animals | <i>Solen grandis</i>           | Lucentini, L., Plazzi, F., Sfriso, A. A., Pizzirani, C., Sfriso, A., & Chiesa, S. (2020). Additional taxonomic coverage of the doubly uniparental inheritance in bivalves: Evidence of sex-linked heteroplasmy in the razor clam <i>Solen marginatus</i> Pulteney, 1799, but not in the lagoon cockle <i>Cerastoderma glaucum</i> (Bruguère, 1789). <i>Journal of Zoological Systematics and Evolutionary Research</i> , 58(2), 561-570. |
| DUI | Mitochondria | Animals | <i>Solenia carinatus</i>       | Huang, X. C., Rong, J., Liu, Y., Zhang, M. H., Wan, Y., Ouyang, S., ... & Wu, X. P. (2013). The complete maternally and paternally inherited mitochondrial genomes of the endangered freshwater mussel <i>Solenia carinatus</i> (Bivalvia: Unionidae) and implications for Unionidae taxonomy. <i>PLoS One</i> , 8(12), e84352.                                                                                                          |
| DUI | Mitochondria | Animals | <i>Strophitus undulatus</i>    | Stewart, D. T., Hoeh, W. R., Bauer, G., & Breton, S. (2013). Mitochondrial genes, sex determination and hermaphroditism in freshwater mussels (Bivalvia: Unionoida). In <i>Evolutionary biology: exobiology and evolutionary mechanisms</i> (pp. 245-255). Springer, Berlin, Heidelberg.                                                                                                                                                 |
| DUI | Mitochondria | Animals | <i>Toxolasma glans</i>         | Stewart, D. T., Hoeh, W. R., Bauer, G., & Breton, S. (2013). Mitochondrial genes, sex determination and hermaphroditism in freshwater mussels (Bivalvia: Unionoida). In <i>Evolutionary biology: exobiology and evolutionary mechanisms</i> (pp. 245-255). Springer, Berlin, Heidelberg.                                                                                                                                                 |
| DUI | Mitochondria | Animals | <i>Toxolasma lividus</i>       | Stewart, D. T., Hoeh, W. R., Bauer, G., & Breton, S. (2013). Mitochondrial genes, sex determination and hermaphroditism in freshwater mussels (Bivalvia: Unionoida). In <i>Evolutionary biology: exobiology and evolutionary mechanisms</i> (pp. 245-255). Springer, Berlin, Heidelberg.                                                                                                                                                 |



|     |              |         |                                    |                                                                                                                                                                                                                                                                                                                                                                                          |
|-----|--------------|---------|------------------------------------|------------------------------------------------------------------------------------------------------------------------------------------------------------------------------------------------------------------------------------------------------------------------------------------------------------------------------------------------------------------------------------------|
| DUI | Mitochondria | Animals | <i>Toxolasma minor</i>             | Stewart, D. T., Hoeh, W. R., Bauer, G., & Breton, S. (2013). Mitochondrial genes, sex determination and hermaphroditism in freshwater mussels (Bivalvia: Unionoida). In <i>Evolutionary biology: exobiology and evolutionary mechanisms</i> (pp. 245-255). Springer, Berlin, Heidelberg.                                                                                                 |
| DUI | Mitochondria | Animals | <i>Toxolasma paulus</i>            | Stewart, D. T., Hoeh, W. R., Bauer, G., & Breton, S. (2013). Mitochondrial genes, sex determination and hermaphroditism in freshwater mussels (Bivalvia: Unionoida). In <i>Evolutionary biology: exobiology and evolutionary mechanisms</i> (pp. 245-255). Springer, Berlin, Heidelberg.                                                                                                 |
| DUI | Mitochondria | Animals | <i>Truncilla truncate</i>          | Walker, J. M., Curole, J. P., Wade, D. E., Chapman, E. G., Bogan, A. E., Watters, G. T., & Hoeh, W. R. (2006). Taxonomic distribution and phylogenetic utility of gender-associated mitochondrial genomes in the Unionoida (Bivalvia). <i>MALACOLOGIA-PHILADELPHIA</i> , 48(1/2), 265.                                                                                                   |
| DUI | Mitochondria | Animals | <i>Unio crassus</i>                | Soroka, M. (2010). Characteristics of mitochondrial DNA of unionid bivalves (Mollusca: Bivalvia: Unionidae). I. Detection and characteristics of doubly uniparental inheritance (DUI) of unionid mitochondrial DNA. <i>Folia malacologica</i> , 18(4).                                                                                                                                   |
| DUI | Mitochondria | Animals | <i>Unio delphinus</i>              | Machordom, A., Araujo, R., Toledo, C., Zouros, E., & Ladoukakis, E. D. (2015). Female-dependent transmission of paternal mtDNA is a shared feature of bivalve species with doubly uniparental inheritance (DUI) of mitochondrial DNA. <i>Journal of Zoological Systematics and Evolutionary Research</i> , 53(3), 200-204.                                                               |
| DUI | Mitochondria | Animals | <i>Unio pictorum</i>               | Soroka, M. (2010). Characteristics of mitochondrial DNA of unionid bivalves (Mollusca: Bivalvia: Unionidae). I. Detection and characteristics of doubly uniparental inheritance (DUI) of unionid mitochondrial DNA. <i>Folia malacologica</i> , 18(4).                                                                                                                                   |
| DUI | Mitochondria | Animals | <i>Unio tumidus</i>                | Soroka, M. (2010). Characteristics of mitochondrial DNA of unionid bivalves (Mollusca: Bivalvia: Unionidae). I. Detection and characteristics of doubly uniparental inheritance (DUI) of unionid mitochondrial DNA. <i>Folia malacologica</i> , 18(4).                                                                                                                                   |
| DUI | Mitochondria | Animals | <i>Utterbackia peggyae</i>         | Breton, S., Stewart, D. T., Shepardson, S., Trdan, R. J., Bogan, A. E., Chapman, E. G., ... & Hoeh, W. R. (2011). Novel protein genes in animal mtDNA: a new sex determination system in freshwater mussels (Bivalvia: Unionoida)?. <i>Molecular Biology and Evolution</i> , 28(5), 1645-1659.                                                                                           |
| DUI | Mitochondria | Animals | <i>Utterbackia peninsularis</i>    | Breton, S., Stewart, D. T., Shepardson, S., Trdan, R. J., Bogan, A. E., Chapman, E. G., ... & Hoeh, W. R. (2011). Novel protein genes in animal mtDNA: a new sex determination system in freshwater mussels (Bivalvia: Unionoida)?. <i>Molecular Biology and Evolution</i> , 28(5), 1645-1659.                                                                                           |
| DUI | Mitochondria | Animals | <i>Venerupis philippinarum</i>     | Passamonti, M., & Scali, V. (2001). Gender-associated mitochondrial DNA heteroplasmy in the venerid clam <i>Tapes philippinarum</i> (Mollusca Bivalvia). <i>Current genetics</i> , 39(2), 117-124.                                                                                                                                                                                       |
| DUI | Mitochondria | Animals | <i>Venustaconcha ellipsiformis</i> | Chakrabarti, R., Walker, J. M., Stewart, D. T., Trdan, R. J., Vijayaraghavan, S., Curole, J. P., & Hoeh, W. R. (2006). Presence of a unique male-specific extension of C-terminus to the cytochrome c oxidase subunit II protein coded by the male-transmitted mitochondrial genome of <i>Venustaconcha ellipsiformis</i> (Bivalvia: Unionoidea). <i>FEBS letters</i> , 580(3), 862-866. |
| DUI | Mitochondria | Animals | <i>Villosa lienosa</i>             | Curole, J. P., & Kocher, T. D. (2005). Evolution of a unique mitotype-specific protein-coding extension of the cytochrome c oxidase II gene in freshwater mussels (Bivalvia: Unionoida). <i>Journal of Molecular Evolution</i> , 61(3), 381-389.                                                                                                                                         |

|                      |              |         |                                                                 |                                                                                                                                                                                                                                                                                                                                                       |
|----------------------|--------------|---------|-----------------------------------------------------------------|-------------------------------------------------------------------------------------------------------------------------------------------------------------------------------------------------------------------------------------------------------------------------------------------------------------------------------------------------------|
| DUI                  | Mitochondria | Animals | <i>Villosa villosa</i>                                          | Walker, J. M., Curole, J. P., Wade, D. E., Chapman, E. G., Bogan, A. E., Watters, G. T., & Hoeh, W. R. (2006). Taxonomic distribution and phylogenetic utility of gender-associated mitochondrial genomes in the Unionoida (Bivalvia). <i>MALACOLOGIA-PHILADELPHIA</i> , <i>48</i> (1/2), 265.                                                        |
| DUI                  | Mitochondria | Animals | <i>Yoldia hyperborea</i>                                        | Gusman, A., Lecomte, S., Stewart, D. T., Passamonti, M., & Breton, S. (2016). Pursuing the quest for better understanding the taxonomic distribution of the system of doubly uniparental inheritance of mtDNA. <i>PeerJ</i> , <i>4</i> , e2760.                                                                                                       |
| Paternal Inheritance | Mitochondria | Animals | <i>Antheraea proylei</i>                                        | Arunkumar, K. P., Metta, M., & Nagaraju, J. (2006). Molecular phylogeny of silkmoths reveals the origin of domesticated silkmoth, Bombyx mori from Chinese Bombyx mandarina and paternal inheritance of Antheraea proylei mitochondrial DNA. <i>Molecular Phylogenetics and Evolution</i> , <i>40</i> (2), 419-427.                                   |
| Paternal Leakage     | Mitochondria | Animals | <i>Alectoris graeca</i> (rock partridge)                        | Gandolfi, A., Crestanello, B., Fagotti, A., Simoncelli, F., Chiesa, S., Girardi, M., ... & Lucentini, L. (2017). New evidences of mitochondrial DNA heteroplasmy by putative paternal leakage between the rock partridge ( <i>Alectoris graeca</i> ) and the chukar partridge ( <i>Alectoris chukar</i> ). <i>PLoS One</i> , <i>12</i> (1), e0170507. |
| Paternal Leakage     | Mitochondria | Animals | <i>Apis mellifera</i> (honeybee)                                | Meusel, M. S., & Moritz, R. F. (1993). Transfer of paternal mitochondrial DNA during fertilization of honeybee ( <i>Apis mellifera</i> L.) eggs. <i>Current genetics</i> , <i>24</i> (6), 539-543.                                                                                                                                                    |
| Paternal Leakage     | Mitochondria | Animals | <i>Bos taurus</i> (cow)                                         | Steinborn, R., Zakhartchenko, V., Jelyazkov, J., Klein, D., Wolf, E., Müller, M., & Brem, G. (1998). Composition of parental mitochondrial DNA in cloned bovine embryos. <i>FEBS letters</i> , <i>426</i> (3), 352-356.                                                                                                                               |
| Paternal Leakage     | Mitochondria | Animals | <i>Buthus mardoechi</i>                                         | Gantenbein, B., Fet, V., Gantenbein-Ritter, I. A., & Balloux, F. (2005). Evidence for recombination in scorpion mitochondrial DNA (Scorpiones: Buthidae). <i>Proceedings of the Royal Society B: Biological Sciences</i> , <i>272</i> (1564), 697-704.                                                                                                |
| Paternal Leakage     | Mitochondria | Animals | <i>Caenorhabditis briggsae</i>                                  | Adineh, S., & Ross, J. A. (2019). The ebb and flow of heteroplasmy during intra-species hybridization in <i>Caenorhabditis briggsae</i> . <i>BioRxiv</i> , 623207.                                                                                                                                                                                    |
| Paternal Leakage     | Mitochondria | Animals | <i>Chlamydosaurus kingii</i>                                    | Ujvari, B., Downton, M., & Madsen, T. (2007). Mitochondrial DNA recombination in a free-ranging Australian lizard. <i>Biology Letters</i> , <i>3</i> (2), 189-192.                                                                                                                                                                                    |
| Paternal Leakage     | Mitochondria | Animals | <i>Cimex lectularius</i> (bed bug)                              | Robison, G. A., Balvin, O., Schal, C., Vargo, E. L., & Booth, W. (2015). Extensive mitochondrial heteroplasmy in natural populations of a resurging human pest, the bed bug (Hemiptera: Cimicidae). <i>Journal of medical entomology</i> , <i>52</i> (4), 734-738.                                                                                    |
| Paternal Leakage     | Mitochondria | Animals | <i>Cyprinus carpio haematopterus x Megalobrama amblycephala</i> | Wang, Y., Sun, W., Gu, Q., Yao, J., Tan, H., Huang, X., ... & Liu, S. (2021). Variations in the Mitochondrial Genome of a Goldfish-Like Hybrid [Koi Carp (♀) × Blunt Snout Bream (♂)] Indicate Paternal Leakage. <i>Frontiers in genetics</i> , <i>11</i> , 1688.                                                                                     |
| Paternal Leakage     | Mitochondria | Animals | <i>Drosophila melanogaster</i>                                  | Sherengul, W., Kondo, R., & Matsuura, E. T. (2006). Analysis of paternal transmission of mitochondrial DNA in <i>Drosophila</i> . <i>Genes &amp; genetic systems</i> , <i>81</i> (6), 399-404.                                                                                                                                                        |
| Paternal Leakage     | Mitochondria | Animals | <i>Drosophila mauritiana</i> x <i>D. simulans</i> hybrid        | Kondo, R., Satta, Y., Matsuura, E. T., Ishiwa, H., Takahata, N., & Chigusa, S. I. (1990). Incomplete maternal transmission of mitochondrial DNA in <i>Drosophila</i> . <i>Genetics</i> , <i>126</i> (3), 657-663.                                                                                                                                     |
| Paternal Leakage     | Mitochondria | Animals | <i>Drosophila simulans</i>                                      | Kondo, R., Matsuura, E. T., & Chigusa, S. I. (1992). Further observation of paternal transmission of <i>Drosophila</i> mitochondrial DNA by PCR selective amplification method. <i>Genetics Research</i> , <i>59</i> (2), 81-84.                                                                                                                      |

|                  |              |         |                                                                                                            |                                                                                                                                                                                                                                                                                    |
|------------------|--------------|---------|------------------------------------------------------------------------------------------------------------|------------------------------------------------------------------------------------------------------------------------------------------------------------------------------------------------------------------------------------------------------------------------------------|
| Paternal Leakage | Mitochondria | Animals | <i>Drosophila simulans</i>                                                                                 | Wolff, J. N., Nafisinia, M., Sutovsky, P., & Ballard, J. W. O. (2013). Paternal transmission of mitochondrial DNA as an integral part of mitochondrial inheritance in metapopulations of <i>Drosophila simulans</i> . <i>Heredity</i> , 110(1), 57-62.                             |
| Paternal Leakage | Mitochondria | Animals | <i>Drosophila simulans</i> x <i>D. mauritiana</i> hybrid                                                   | Polovina, E. S., Parakatselaki, M. E., & Ladoukakis, E. D. (2020). Paternal leakage of mitochondrial DNA and maternal inheritance of heteroplasmy in <i>Drosophila</i> hybrids. <i>Scientific Reports</i> , 10(1), 1-9.                                                            |
| Paternal Leakage | Mitochondria | Animals | <i>Drosophila simulans</i> x <i>D. sechellia</i> hybrid                                                    | Dokianakis, E., & Ladoukakis, E. D. (2014). Different degree of paternal mt DNA leakage between male and female progeny in interspecific <i>Drosophila</i> crosses. <i>Ecology and evolution</i> , 4(13), 2633-2641.                                                               |
| Paternal Leakage | Mitochondria | Animals | <i>Drosophila teissieri</i> x <i>D. mauritiana</i> hybrid                                                  | Dokianakis, E., & Ladoukakis, E. D. (2014). Different degree of paternal mt DNA leakage between male and female progeny in interspecific <i>Drosophila</i> crosses. <i>Ecology and evolution</i> , 4(13), 2633-2641.                                                               |
| Paternal Leakage | Mitochondria | Animals | <i>Drosophila yakuba</i> x <i>D. mauritiana</i> hybrid                                                     | Dokianakis, E., & Ladoukakis, E. D. (2014). Different degree of paternal mt DNA leakage between male and female progeny in interspecific <i>Drosophila</i> crosses. <i>Ecology and evolution</i> , 4(13), 2633-2641.                                                               |
| Paternal Leakage | Mitochondria | Animals | <i>Gallus gallus</i>                                                                                       | Alexander M, Ho SY, Molak M, Barnett R, Carlborg Ö, Dorshorst B, et al. Mitogenomic analysis of a 50-generation chicken pedigree reveals a rapid rate of mitochondrial evolution and evidence for paternal mtDNA inheritance. <i>Biol Lett</i> . 2015; 11: 20150561. pmid:26510672 |
| Paternal Leakage | Mitochondria | Animals | <i>Heliothis virescens</i> x <i>H. subflexa</i> (budworm hybrid)                                           | Lansman, R. A., Avise, J. C., & Huettel, M. D. (1983). Critical experimental test of the possibility of "paternal leakage" of mitochondrial DNA. <i>Proceedings of the National Academy of Sciences</i> , 80(7), 1969-1971.                                                        |
| Paternal Leakage | Mitochondria | Animals | <i>Homo sapiens</i> (human)                                                                                | Schwartz, M., & Vissing, J. (2002). Paternal inheritance of mitochondrial DNA. <i>New England Journal of Medicine</i> , 347(8), 576-580.                                                                                                                                           |
| Paternal Leakage | Mitochondria | Animals | <i>Homo sapiens</i> (human)                                                                                | Luo, S., Valencia, C. A., Zhang, J., Lee, N. C., Slone, J., Gui, B., ... & Huang, T. (2018). Biparental inheritance of mitochondrial DNA in humans. <i>Proceedings of the National Academy of Sciences</i> , 115(51), 13039-13044.                                                 |
| Paternal Leakage | Mitochondria | Animals | <i>Magicicada septendecim</i> ; <i>M. septendecula</i> ; <i>M. cassini</i> (17-year period cicada hybrids) | Fontaine, K. M., Cooley, J. R., & Simon, C. (2007). Evidence for paternal leakage in hybrid periodical cicadas (Hemiptera: Magicicada spp.). <i>PloS one</i> , 2(9), e892.                                                                                                         |
| Paternal Leakage | Mitochondria | Animals | <i>Mesobuthus caucasicus</i>                                                                               | Gantenbein, B., Fet, V., Gantenbein-Ritter, I. A., & Balloux, F. (2005). Evidence for recombination in scorpion mitochondrial DNA (Scorpiones: Buthidae). <i>Proceedings of the Royal Society B: Biological Sciences</i> , 272(1564), 697-704.                                     |
| Paternal Leakage | Mitochondria | Animals | <i>Mesobuthus eupeus</i>                                                                                   | Gantenbein, B., Fet, V., Gantenbein-Ritter, I. A., & Balloux, F. (2005). Evidence for recombination in scorpion mitochondrial DNA (Scorpiones: Buthidae). <i>Proceedings of the Royal Society B: Biological Sciences</i> , 272(1564), 697-704.                                     |
| Paternal Leakage | Mitochondria | Animals | <i>Mesobuthus gibbosus</i>                                                                                 | Gantenbein, B., Fet, V., Gantenbein-Ritter, I. A., & Balloux, F. (2005). Evidence for recombination in scorpion mitochondrial DNA (Scorpiones: Buthidae). <i>Proceedings of the Royal Society B: Biological Sciences</i> , 272(1564), 697-704.                                     |
| Paternal Leakage | Mitochondria | Animals | <i>Mus musculus</i> (mouse)                                                                                | Gyllenstein, U., Wharton, D., Josefsson, A., & Wilson, A. C. (1991). Paternal inheritance of mitochondrial DNA in mice. <i>Nature</i> , 352(6332), 255-257.                                                                                                                        |

|                                            |              |         |                                                                                                        |                                                                                                                                                                                                                                                                                                                    |
|--------------------------------------------|--------------|---------|--------------------------------------------------------------------------------------------------------|--------------------------------------------------------------------------------------------------------------------------------------------------------------------------------------------------------------------------------------------------------------------------------------------------------------------|
| Paternal Leakage                           | Mitochondria | Animals | <i>Mus musculus</i> (mouse)                                                                            | Shitara, H., Hayashi, J. I., Takahama, S., Kaneda, H., & Yonekawa, H. (1998). Maternal inheritance of mouse mtDNA in interspecific hybrids: segregation of the leaked paternal mtDNA followed by the prevention of subsequent paternal leakage. <i>Genetics</i> , <i>148</i> (2), 851-857.                         |
| Paternal Leakage                           | Mitochondria | Animals | <i>Nyctereutes procyonoides</i>                                                                        | Nisztuk-Pacek, S., Ślaska, B., Grzybowska-Szatkowska, L., & Babicz, M. (2019). Paternal leakage of mitochondrial dna in the raccoon dog ( <i>Nyctereutes procyonoides</i> gray 1834). <i>Annals of Animal Science</i> , <i>19</i> (1), 61-69.                                                                      |
| Paternal Leakage                           | Mitochondria | Animals | <i>Ovis aries</i> (sheep)                                                                              | Zhao, X., Li, N., Guo, W., Hu, X., Liu, Z., Gong, G., ... & Wu, C. (2004). Further evidence for paternal inheritance of mitochondrial DNA in the sheep ( <i>Ovis aries</i> ). <i>Heredity</i> , <i>93</i> (4), 399-403.                                                                                            |
| Paternal Leakage                           | Mitochondria | Animals | <i>Papilio glaucus</i>                                                                                 | Andolfatto, P., Scriber, J. M., & Charlesworth, B. (2003). No association between mitochondrial DNA haplotypes and a female-limited mimicry phenotype in <i>Papilio glaucus</i> . <i>Evolution</i> , <i>57</i> (2), 305-316.                                                                                       |
| Paternal Leakage                           | Mitochondria | Animals | <i>Parus major</i> (great tit)                                                                         | Kvist, L., Martens, J., Nazarenko, A. A., & Orell, M. (2003). Paternal leakage of mitochondrial DNA in the great tit ( <i>Parus major</i> ). <i>Molecular Biology and Evolution</i> , <i>20</i> (2), 243-247.                                                                                                      |
| Paternal Leakage                           | Mitochondria | Animals | <i>Platichthys flesus</i>                                                                              | Hoarau, G., Holla, S., Lescasse, R., Stam, W. T., & Olsen, J. L. (2002). Heteroplasmy and evidence for recombination in the mitochondrial control region of the flatfish <i>Platichthys flesus</i> . <i>Molecular Biology and Evolution</i> , <i>19</i> (12), 2261-2264.                                           |
| Paternal Leakage                           | Mitochondria | Animals | <i>Rhipicephalus</i>                                                                                   | Mastrantonio, V., Latrofa, M. S., Porretta, D., Lia, R. P., Parisi, A., Iatta, R., ... & Urbanelli, S. (2019). Paternal leakage and mtDNA heteroplasmy in <i>Rhipicephalus</i> spp. ticks. <i>Scientific reports</i> , <i>9</i> (1), 1-8.                                                                          |
| Paternal Leakage                           | Mitochondria | Animals | <i>Scomberomorus munroi</i> (spotted mackerel)<br>x <i>Scomberomorus semifasciatus</i> (gray mackerel) | Morgan, J. A., Macbeth, M., Broderick, D., Whatmore, P., Street, R., Welch, D. J., & Ovenden, J. R. (2013). Hybridisation, paternal leakage and mitochondrial DNA linearization in three anomalous fish (Scombridae). <i>Mitochondrion</i> , <i>13</i> (6), 852-861.                                               |
| Paternal Leakage                           | Mitochondria | Animals | <i>Thrips tabaci</i>                                                                                   | Gawande, S. J., Anandhan, S., Ingle, A. A., Jacobson, A., & Asokan, R. (2017). Heteroplasmy due to coexistence of mtCOI haplotypes from different lineages of the <i>Thrips tabaci</i> cryptic species group. <i>Bulletin of entomological research</i> , <i>107</i> (4), 534-542.                                 |
| Divergent Heteroplasmy (unknown mechanism) | Mitochondria | Animals | <i>Gonioctena intermedia</i>                                                                           | Kastally, C., & Mardulyn, P. (2017). Widespread co-occurrence of two distantly related mitochondrial genomes in individuals of the leaf beetle <i>Gonioctena intermedia</i> . <i>Biology letters</i> , <i>13</i> (11), 20170570.                                                                                   |
| Divergent Heteroplasmy (unknown mechanism) | Mitochondria | Animals | <i>Sphenodon punctatus</i> (tuatara)                                                                   | Macey, J. R., Pabinger, S., Barbieri, C. G., Buring, E. S., Gonzalez, V. L., Mulcahy, D. G., ... & Gemmill, N. J. (2021). Evidence of two deeply divergent co-existing mitochondrial genomes in the Tuatara reveals an extremely complex genomic organization. <i>Communications biology</i> , <i>4</i> (1), 1-10. |
| Biparental Inheritance                     | Mitochondria | Fungi   | <i>Saccharomyces cerevisiae</i> (Baker's yeast)                                                        | Birky Jr, C. W. (1978). Transmission genetics of mitochondria and chloroplasts. <i>Annual review of genetics</i> , <i>12</i> (1), 471-512.                                                                                                                                                                         |

|                        |              |        |                                    |                                                                                                                                                                                                                                 |
|------------------------|--------------|--------|------------------------------------|---------------------------------------------------------------------------------------------------------------------------------------------------------------------------------------------------------------------------------|
| Biparental Inheritance | Mitochondria | Fungi  | <i>Cryptococcus neoformans</i>     | Yan, Z., Sun, S., Shahid, M., & Xu, J. (2007). Environment factors can influence mitochondrial inheritance in the fungus <i>Cryptococcus neoformans</i> . <i>Fungal Genetics and Biology</i> , 44(5), 315-322.                  |
| Biparental Inheritance | Chloroplasts | Plants | <i>Borago officinalis</i>          | Sears, B. B. (1980). Elimination of plastids during spermatogenesis and fertilization in the plant kingdom. <i>Plasmid</i> , 4(3), 233-255.                                                                                     |
| Biparental Inheritance | Chloroplasts | Plants | <i>Campanula alliariaefolia</i>    | Corriveau, J. L., & Coleman, A. W. (1988). Rapid screening method to detect potential biparental inheritance of plastid DNA and results for over 200 angiosperm species. <i>American Journal of Botany</i> , 75(10), 1443-1458. |
| Biparental Inheritance | Chloroplasts | Plants | <i>Campanula americana</i>         | Barnard-Kubow, K. B., McCoy, M. A., & Galloway, L. F. (2017). Biparental chloroplast inheritance leads to rescue from cytonuclear incompatibility. <i>New Phytologist</i> , 213(3), 1466-1476.                                  |
| Biparental Inheritance | Chloroplasts | Plants | <i>Campanula carpatica</i>         | Corriveau, J. L., & Coleman, A. W. (1988). Rapid screening method to detect potential biparental inheritance of plastid DNA and results for over 200 angiosperm species. <i>American Journal of Botany</i> , 75(10), 1443-1458. |
| Biparental Inheritance | Chloroplasts | Plants | <i>Campanula rapunculoides</i>     | Corriveau, J. L., & Coleman, A. W. (1988). Rapid screening method to detect potential biparental inheritance of plastid DNA and results for over 200 angiosperm species. <i>American Journal of Botany</i> , 75(10), 1443-1458. |
| Biparental Inheritance | Chloroplasts | Plants | <i>Cryptomeria japonica</i> (sugi) | Ohba, K. (1971). Paternal transmission of a plastid anomaly in some reciprocal crosses of sugi, <i>Cryptomeria japonica</i> . <i>Silvae Genet.</i> , 20, 101-107.                                                               |
| Biparental Inheritance | Chloroplasts | Plants | <i>Dionaea muscipula</i>           | Corriveau, J. L., & Coleman, A. W. (1988). Rapid screening method to detect potential biparental inheritance of plastid DNA and results for over 200 angiosperm species. <i>American Journal of Botany</i> , 75(10), 1443-1458. |
| Biparental Inheritance | Chloroplasts | Plants | <i>Drosera capillaris</i>          | Corriveau, J. L., & Coleman, A. W. (1988). Rapid screening method to detect potential biparental inheritance of plastid DNA and results for over 200 angiosperm species. <i>American Journal of Botany</i> , 75(10), 1443-1458. |
| Biparental Inheritance | Chloroplasts | Plants | <i>Fagopyrum esculentum</i>        | Reboud, X., & Zeyl, C. (1994). Organelle inheritance in plants. <i>Heredity</i> , 72(2), 132-140.                                                                                                                               |
| Biparental Inheritance | Chloroplasts | Plants | <i>Geranium bohemicum</i>          | Sears, B. B. (1980). Elimination of plastids during spermatogenesis and fertilization in the plant kingdom. <i>Plasmid</i> , 4(3), 233-255.                                                                                     |
| Biparental Inheritance | Chloroplasts | Plants | <i>Geranium bohemicum</i>          | Sears, B. B. (1980). Elimination of plastids during spermatogenesis and fertilization in the plant kingdom. <i>Plasmid</i> , 4(3), 233-255.                                                                                     |
| Biparental Inheritance | Chloroplasts | Plants | <i>Geranium maculatum</i>          | Corriveau, J. L., & Coleman, A. W. (1988). Rapid screening method to detect potential biparental inheritance of plastid DNA and results for over 200 angiosperm species. <i>American Journal of Botany</i> , 75(10), 1443-1458. |
| Biparental Inheritance | Chloroplasts | Plants | <i>Geranium pratense</i>           | Corriveau, J. L., & Coleman, A. W. (1988). Rapid screening method to detect potential biparental inheritance of plastid DNA and results for over 200 angiosperm species. <i>American Journal of Botany</i> , 75(10), 1443-1458. |
| Biparental Inheritance | Chloroplasts | Plants | <i>Geranium sanguineum</i>         | Corriveau, J. L., & Coleman, A. W. (1988). Rapid screening method to detect potential biparental inheritance of plastid DNA and results for over 200 angiosperm species. <i>American Journal of Botany</i> , 75(10), 1443-1458. |
| Biparental Inheritance | Chloroplasts | Plants | <i>Hypericum acutum</i>            | Tilney-Basset, R. A. E. (1978). The inheritance and behaviour of plastids.                                                                                                                                                      |

|                        |              |        |                                                  |                                                                                                                                                                                                                                 |
|------------------------|--------------|--------|--------------------------------------------------|---------------------------------------------------------------------------------------------------------------------------------------------------------------------------------------------------------------------------------|
| Biparental Inheritance | Chloroplasts | Plants | <i>Lathyrus japonicus</i>                        | Corriveau, J. L., & Coleman, A. W. (1988). Rapid screening method to detect potential biparental inheritance of plastid DNA and results for over 200 angiosperm species. <i>American Journal of Botany</i> , 75(10), 1443-1458. |
| Biparental Inheritance | Chloroplasts | Plants | <i>Lathyrus odoratus</i>                         | Corriveau, J. L., & Coleman, A. W. (1988). Rapid screening method to detect potential biparental inheritance of plastid DNA and results for over 200 angiosperm species. <i>American Journal of Botany</i> , 75(10), 1443-1458. |
| Biparental Inheritance | Chloroplasts | Plants | <i>Linnaea borealis</i>                          | Corriveau, J. L., & Coleman, A. W. (1988). Rapid screening method to detect potential biparental inheritance of plastid DNA and results for over 200 angiosperm species. <i>American Journal of Botany</i> , 75(10), 1443-1458. |
| Biparental Inheritance | Chloroplasts | Plants | <i>Lobelia siphilitica</i>                       | Corriveau, J. L., & Coleman, A. W. (1988). Rapid screening method to detect potential biparental inheritance of plastid DNA and results for over 200 angiosperm species. <i>American Journal of Botany</i> , 75(10), 1443-1458. |
| Biparental Inheritance | Chloroplasts | Plants | <i>Lonicera japonica</i>                         | Corriveau, J. L., & Coleman, A. W. (1988). Rapid screening method to detect potential biparental inheritance of plastid DNA and results for over 200 angiosperm species. <i>American Journal of Botany</i> , 75(10), 1443-1458. |
| Biparental Inheritance | Chloroplasts | Plants | <i>Lpilobium hirsutum</i>                        | Reboud, X., & Zeyl, C. (1994). Organelle inheritance in plants. <i>Heredity</i> , 72(2), 132-140.                                                                                                                               |
| Biparental Inheritance | Chloroplasts | Plants | <i>Medicago truncatula</i>                       | Sears, B. B. (1980). Elimination of plastids during spermatogenesis and fertilization in the plant kingdom. <i>Plasmid</i> , 4(3), 233-255.                                                                                     |
| Biparental Inheritance | Chloroplasts | Plants | <i>Melilotus alba</i>                            | Corriveau, J. L., & Coleman, A. W. (1988). Rapid screening method to detect potential biparental inheritance of plastid DNA and results for over 200 angiosperm species. <i>American Journal of Botany</i> , 75(10), 1443-1458. |
| Biparental Inheritance | Chloroplasts | Plants | <i>Melilotus indica</i>                          | Corriveau, J. L., & Coleman, A. W. (1988). Rapid screening method to detect potential biparental inheritance of plastid DNA and results for over 200 angiosperm species. <i>American Journal of Botany</i> , 75(10), 1443-1458. |
| Biparental Inheritance | Chloroplasts | Plants | <i>Melilotus officinalis</i>                     | Corriveau, J. L., & Coleman, A. W. (1988). Rapid screening method to detect potential biparental inheritance of plastid DNA and results for over 200 angiosperm species. <i>American Journal of Botany</i> , 75(10), 1443-1458. |
| Biparental Inheritance | Chloroplasts | Plants | <i>Nepeta cataria</i>                            | Sears, B. B. (1980). Elimination of plastids during spermatogenesis and fertilization in the plant kingdom. <i>Plasmid</i> , 4(3), 233-255.                                                                                     |
| Biparental Inheritance | Chloroplasts | Plants | <i>Nepeta cataria</i>                            | Reboud, X., & Zeyl, C. (1994). Organelle inheritance in plants. <i>Heredity</i> , 72(2), 132-140.                                                                                                                               |
| Biparental Inheritance | Chloroplasts | Plants | <i>Oenothera ammophila</i> ; <i>Oe. perennis</i> | Corriveau, J. L., & Coleman, A. W. (1988). Rapid screening method to detect potential biparental inheritance of plastid DNA and results for over 200 angiosperm species. <i>American Journal of Botany</i> , 75(10), 1443-1458. |
| Biparental Inheritance | Chloroplasts | Plants | <i>Oenothera biennis</i>                         | Corriveau, J. L., & Coleman, A. W. (1988). Rapid screening method to detect potential biparental inheritance of plastid DNA and results for over 200 angiosperm species. <i>American Journal of Botany</i> , 75(10), 1443-1458. |
| Biparental Inheritance | Chloroplasts | Plants | <i>Oenothera grandiflora</i>                     | Corriveau, J. L., & Coleman, A. W. (1988). Rapid screening method to detect potential biparental inheritance of plastid DNA and results for over 200 angiosperm species. <i>American Journal of Botany</i> , 75(10), 1443-1458. |

|                        |              |        |                                                                                                             |                                                                                                                                                                                                                                                                            |
|------------------------|--------------|--------|-------------------------------------------------------------------------------------------------------------|----------------------------------------------------------------------------------------------------------------------------------------------------------------------------------------------------------------------------------------------------------------------------|
| Biparental Inheritance | Chloroplasts | Plants | <i>Oenothera hookeri</i> ; <i>Oe. suaveolens</i> ; <i>Oe. lamarckiana</i> ; <i>Oe. atrovirens</i> (hybrids) | Chiu, W. L., Stubbe, W., & Sears, B. B. (1988). Plastid inheritance in <i>Oenothera</i> : organelle genome modifies the extent of biparental plastid transmission. <i>Current genetics</i> , 13(2), 181-189.                                                               |
| Biparental Inheritance | Chloroplasts | Plants | <i>Oenothera macrosceles</i>                                                                                | Corriveau, J. L., & Coleman, A. W. (1988). Rapid screening method to detect potential biparental inheritance of plastid DNA and results for over 200 angiosperm species. <i>American Journal of Botany</i> , 75(10), 1443-1458.                                            |
| Biparental Inheritance | Chloroplasts | Plants | <i>Passiflora edulis</i>                                                                                    | Corriveau, J. L., & Coleman, A. W. (1988). Rapid screening method to detect potential biparental inheritance of plastid DNA and results for over 200 angiosperm species. <i>American Journal of Botany</i> , 75(10), 1443-1458.                                            |
| Biparental Inheritance | Chloroplasts | Plants | <i>Pelargonium peltatum</i>                                                                                 | Corriveau, J. L., & Coleman, A. W. (1988). Rapid screening method to detect potential biparental inheritance of plastid DNA and results for over 200 angiosperm species. <i>American Journal of Botany</i> , 75(10), 1443-1458.                                            |
| Biparental Inheritance | Chloroplasts | Plants | <i>Pelargonium zonale</i> ; <i>P. inquinans</i> (hybrids)                                                   | Weihe, A., Apitz, J., Pohlheim, F., Salinas-Hartwig, A., & Börner, T. (2009). Biparental inheritance of plastidial and mitochondrial DNA and hybrid variegation in <i>Pelargonium</i> . <i>Molecular Genetics and Genomics</i> , 282(6), 587-593.                          |
| Biparental Inheritance | Chloroplasts | Plants | <i>Pennisetum americanum</i>                                                                                | Rao, M. K., & Koduru, P. R. K. (1978). Cytogenetics of a factor for syncyte formation and male sterility in <i>Pennisetum americanum</i> . <i>Theoretical and Applied Genetics</i> , 53(1), 1-7.                                                                           |
| Biparental Inheritance | Chloroplasts | Plants | <i>Phaseolus vulgaris</i>                                                                                   | Sears, B. B. (1980). Elimination of plastids during spermatogenesis and fertilization in the plant kingdom. <i>Plasmid</i> , 4(3), 233-255.                                                                                                                                |
| Biparental Inheritance | Chloroplasts | Plants | <i>Pinus massoniana</i>                                                                                     | Ni, Z., Zhou, P., Xin, Y., Xu, M., & Xu, L. A. (2021). Parent-offspring variation transmission in full-sib families revealed predominantly paternal inheritance of chloroplast DNA in <i>Pinus massoniana</i> (Pinaceae). <i>Tree Genetics &amp; Genomes</i> , 17(4), 1-7. |
| Biparental Inheritance | Chloroplasts | Plants | <i>Platycodon grandiflorum</i>                                                                              | Corriveau, J. L., & Coleman, A. W. (1988). Rapid screening method to detect potential biparental inheritance of plastid DNA and results for over 200 angiosperm species. <i>American Journal of Botany</i> , 75(10), 1443-1458.                                            |
| Biparental Inheritance | Chloroplasts | Plants | <i>Plumbago auriculata</i>                                                                                  | Corriveau, J. L., & Coleman, A. W. (1988). Rapid screening method to detect potential biparental inheritance of plastid DNA and results for over 200 angiosperm species. <i>American Journal of Botany</i> , 75(10), 1443-1458.                                            |
| Biparental Inheritance | Chloroplasts | Plants | <i>Plumbago capensis</i>                                                                                    | Corriveau, J. L., & Coleman, A. W. (1988). Rapid screening method to detect potential biparental inheritance of plastid DNA and results for over 200 angiosperm species. <i>American Journal of Botany</i> , 75(10), 1443-1458.                                            |
| Biparental Inheritance | Chloroplasts | Plants | <i>Plumbago larpentae</i>                                                                                   | Corriveau, J. L., & Coleman, A. W. (1988). Rapid screening method to detect potential biparental inheritance of plastid DNA and results for over 200 angiosperm species. <i>American Journal of Botany</i> , 75(10), 1443-1458.                                            |
| Biparental Inheritance | Chloroplasts | Plants | <i>Plumbago zeylanica</i>                                                                                   | Corriveau, J. L., & Coleman, A. W. (1988). Rapid screening method to detect potential biparental inheritance of plastid DNA and results for over 200 angiosperm species. <i>American Journal of Botany</i> , 75(10), 1443-1458.                                            |
| Biparental Inheritance | Chloroplasts | Plants | <i>Rhipsalidopsis aertneri</i>                                                                              | Corriveau, J. L., & Coleman, A. W. (1988). Rapid screening method to detect potential biparental inheritance of plastid DNA and results for over 200 angiosperm species. <i>American Journal of Botany</i> , 75(10), 1443-1458.                                            |
| Biparental Inheritance | Chloroplasts | Plants | <i>Rhododendron</i>                                                                                         | Tilney-Basset, R. A. E. (1978). The inheritance and behaviour of plastids.                                                                                                                                                                                                 |

|                        |              |        |                                                                                                                                                |                                                                                                                                                                                                                                                              |
|------------------------|--------------|--------|------------------------------------------------------------------------------------------------------------------------------------------------|--------------------------------------------------------------------------------------------------------------------------------------------------------------------------------------------------------------------------------------------------------------|
| Biparental Inheritance | Chloroplasts | Plants | <i>Rhododendronm aximum</i>                                                                                                                    | Corriveau, J. L., & Coleman, A. W. (1988). Rapid screening method to detect potential biparental inheritance of plastid DNA and results for over 200 angiosperm species. <i>American Journal of Botany</i> , 75(10), 1443-1458.                              |
| Biparental Inheritance | Chloroplasts | Plants | <i>Secale cereale</i> (rye)                                                                                                                    | Sears, B. B. (1980). Elimination of plastids during spermatogenesis and fertilization in the plant kingdom. <i>Plasmid</i> , 4(3), 233-255.                                                                                                                  |
| Biparental Inheritance | Chloroplasts | Plants | <i>Silene otites</i>                                                                                                                           | Tilney-Basset, R. A. E. (1978). The inheritance and behaviour of plastids.                                                                                                                                                                                   |
| Biparental Inheritance | Chloroplasts | Plants | <i>Silene pseudotites</i>                                                                                                                      | Sears, B. B. (1980). Elimination of plastids during spermatogenesis and fertilization in the plant kingdom. <i>Plasmid</i> , 4(3), 233-255.                                                                                                                  |
| Biparental Inheritance | Chloroplasts | Plants | <i>Strelitzia reginae</i>                                                                                                                      | Corriveau, J. L., & Coleman, A. W. (1988). Rapid screening method to detect potential biparental inheritance of plastid DNA and results for over 200 angiosperm species. <i>American Journal of Botany</i> , 75(10), 1443-1458.                              |
| Biparental Inheritance | Chloroplasts | Plants | <i>Wisteria sinensis</i>                                                                                                                       | Corriveau, J. L., & Coleman, A. W. (1988). Rapid screening method to detect potential biparental inheritance of plastid DNA and results for over 200 angiosperm species. <i>American Journal of Botany</i> , 75(10), 1443-1458.                              |
| Biparental Inheritance | Chloroplasts | Plants | <i>Zygocactus truncatus</i>                                                                                                                    | Corriveau, J. L., & Coleman, A. W. (1988). Rapid screening method to detect potential biparental inheritance of plastid DNA and results for over 200 angiosperm species. <i>American Journal of Botany</i> , 75(10), 1443-1458.                              |
| Biparental Inheritance | Mitochondria | Plants | <i>Pelargonium zonale</i> ; <i>P. inquinans</i> (hybrids)                                                                                      | Weihe, A., Apitz, J., Pohlheim, F., Salinas-Hartwig, A., & Börner, T. (2009). Biparental inheritance of plastidial and mitochondrial DNA and hybrid variegation in Pelargonium. <i>Molecular Genetics and Genomics</i> , 282(6), 587-593.                    |
| Maternal Leakage       | Chloroplasts | Plants | <i>Larix</i> (larch) hybrids                                                                                                                   | Szmidt, A. E., Aldén, T., & Hällgren, J. E. (1987). Paternal inheritance of chloroplast DNA in Larix. <i>Plant Molecular Biology</i> , 9(1), 59-64.                                                                                                          |
| Maternal Leakage       | Chloroplasts | Plants | <i>Larix leptolepis</i> ; <i>L. decidua</i> ; <i>L. gmelini</i> ; <i>L. siberica</i> ; <i>L. olgensis</i> ; <i>L. laricina</i> (larch hybrids) | Cipriani, G., Testolin, R., & Morgante, M. (1995). Paternal inheritance of plastids in interspecific hybrids of the genus Actinidia revealed by PCR-amplification of chloroplast DNA fragments. <i>Molecular and General Genetics MGG</i> , 247(6), 693-697. |
| Maternal Leakage       | Chloroplasts | Plants | <i>Pinus radiata</i> (Monterey pine)                                                                                                           | Cato, S. A., & Richardson, T. E. (1996). Inter-and intraspecific polymorphism at chloroplast SSR loci and the inheritance of plastids in Pinus radiata D. Don. <i>Theoretical and Applied Genetics</i> , 93(4), 587-592.                                     |
| Paternal Inheritance   | Chloroplasts | Plants | <i>Actinidia arguta</i> ; <i>A. deliciosa</i> ; <i>A. kolomikta</i> ; <i>A. chinensis</i> (kiwifruit hybrids)                                  | Cipriani, G., Testolin, R., & Morgante, M. (1995). Paternal inheritance of plastids in interspecific hybrids of the genus Actinidia revealed by PCR-amplification of chloroplast DNA fragments. <i>Molecular and General Genetics MGG</i> , 247(6), 693-697. |
| Paternal Inheritance   | Chloroplasts | Plants | <i>Biota orientalis</i> (oriental arborvitae)                                                                                                  | Chesnoy, L. (1969). On the origin of cytoplasm of embryos in Biota orientalis Endl.(Cupressaceae). <i>Acad Sci Compt Rend Ser D</i> .                                                                                                                        |
| Paternal Inheritance   | Chloroplasts | Plants | <i>Calocedrus decurrens</i> (incense cedar)                                                                                                    | Neale, D. B., Marshall, K. A., & Harry, D. E. (1991). Inheritance of chloroplast and mitochondrial DNA in incense-cedar ( <i>Calocedrus decurrens</i> ). <i>Canadian Journal of Forest Research</i> , 21(5), 717-720.                                        |
| Paternal Inheritance   | Chloroplasts | Plants | <i>Daucus carota</i> ; <i>D. maximus</i> ; <i>D. muricatus</i> (wild carrot)                                                                   | Boblenz, K., Nothnagel, T., & Metzclaff, M. (1990). Paternal inheritance of plastids in the genus Daucus. <i>Molecular and General Genetics MGG</i> , 220(3), 489-491.                                                                                       |



|                      |              |        |                                                                                                                                                |                                                                                                                                                                                                                                                                     |
|----------------------|--------------|--------|------------------------------------------------------------------------------------------------------------------------------------------------|---------------------------------------------------------------------------------------------------------------------------------------------------------------------------------------------------------------------------------------------------------------------|
| Paternal Inheritance | Chloroplasts | Plants | <i>Larix</i> (larch) hybrids                                                                                                                   | Szmidt, A. E., Aldén, T., & Hällgren, J. E. (1987). Paternal inheritance of chloroplast DNA in <i>Larix</i> . <i>Plant Molecular Biology</i> , 9(1), 59-64.                                                                                                         |
| Paternal Inheritance | Chloroplasts | Plants | <i>Larix leptolepis</i> ; <i>L. decidua</i> ; <i>L. gmelini</i> ; <i>L. siberica</i> ; <i>L. olgensis</i> ; <i>L. laricina</i> (larch hybrids) | Cipriani, G., Testolin, R., & Morgante, M. (1995). Paternal inheritance of plastids in interspecific hybrids of the genus <i>Actinidia</i> revealed by PCR-amplification of chloroplast DNA fragments. <i>Molecular and General Genetics MGG</i> , 247(6), 693-697. |
| Paternal Inheritance | Chloroplasts | Plants | <i>Medicago sativa</i> (alfalfa)                                                                                                               | Schumann, C. M., & Hancock, J. F. (1989). Paternal inheritance of plastids in <i>Medicago sativa</i> . <i>Theoretical and Applied Genetics</i> , 78(6), 863-866.                                                                                                    |
| Paternal Inheritance | Chloroplasts | Plants | <i>Petunia hybrida</i> (garden petunia)                                                                                                        | Cornu, A., & Dulieu, H. (1988). Pollen Transmission of Plastid-DNA Under Genotypic Control in <i>Petunia hybrida</i> Hort. <i>Journal of Heredity</i> , 79(1), 40-44.                                                                                               |
| Paternal Inheritance | Chloroplasts | Plants | <i>Picea glauca</i> (white spruce)                                                                                                             | Stine, M., Sears, B. B., & Keathley, D. E. (1989). Inheritance of plastids in interspecific hybrids of blue spruce and white spruce. <i>Theoretical and applied genetics</i> , 78(6), 768-774.                                                                      |
| Paternal Inheritance | Chloroplasts | Plants | <i>Picea pungens</i> (blue spruce)                                                                                                             | Stine, M., Sears, B. B., & Keathley, D. E. (1989). Inheritance of plastids in interspecific hybrids of blue spruce and white spruce. <i>Theoretical and applied genetics</i> , 78(6), 768-774.                                                                      |
| Paternal Inheritance | Chloroplasts | Plants | <i>Pinus monticola</i> (western white pine)                                                                                                    | White, E. E. (1990). Chloroplast DNA in <i>Pinus monticola</i> . <i>Theoretical and Applied Genetics</i> , 79(1), 119-124.                                                                                                                                          |
| Paternal Inheritance | Chloroplasts | Plants | <i>Pinus radiata</i> (Monterey pine)                                                                                                           | Cato, S. A., & Richardson, T. E. (1996). Z Inter- and intraspecific polymorphism at chloroplast SSR loci and the inheritance of plastids in <i>Pinus radiata</i> D. Don. <i>Theoretical and Applied Genetics</i> , 93(4), 587-592.                                  |
| Paternal Inheritance | Chloroplasts | Plants | <i>Pinus tabulaeformis</i>                                                                                                                     | Guo, F., Hu, S. Y., Yuan, Z., Zee, S. Y., & Han, Y. (2005). Paternal cytoplasmic transmission in Chinese pine ( <i>Pinus tabulaeformis</i> ). <i>Protoplasma</i> , 225(1), 5-14.                                                                                    |
| Paternal Inheritance | Chloroplasts | Plants | <i>Pinus taeda</i> (loblolly pine)                                                                                                             | Neale, D. B., & Sederoff, R. R. (1989). Paternal inheritance of chloroplast DNA and maternal inheritance of mitochondrial DNA in loblolly pine. <i>Theoretical and Applied Genetics</i> , 77(2), 212-216.                                                           |
| Paternal Inheritance | Chloroplasts | Plants | <i>Pseudotsuga menziesii</i> (Douglas fir)                                                                                                     | Neale, D. B., Wheeler, N. C., & Allard, R. W. (1986). Paternal inheritance of chloroplast DNA in Douglas-fir. <i>Canadian Journal of Forest Research</i> , 16(5), 1152-1154.                                                                                        |
| Paternal Inheritance | Chloroplasts | Plants | <i>Sequoia sempervirens</i> (coastal redwood)                                                                                                  | Neale, D. B., Marshall, K. A., & Sederoff, R. R. (1989). Chloroplast and mitochondrial DNA are paternally inherited in <i>Sequoia sempervirens</i> D. Don Endl. <i>Proceedings of the National Academy of Sciences</i> , 86(23), 9347-9349.                         |
| Paternal Inheritance | Mitochondria | Plants | <i>Calocedrus decurrens</i> (incense cedar)                                                                                                    | Neale, D. B., Marshall, K. A., & Harry, D. E. (1991). Inheritance of chloroplast and mitochondrial DNA in incense-cedar ( <i>Calocedrus decurrens</i> ). <i>Canadian Journal of Forest Research</i> , 21(5), 717-720.                                               |
| Paternal Inheritance | Mitochondria | Plants | <i>Cucumis melo</i> (melon)                                                                                                                    | Havey, M. J., McCreight, J. D., Rhodes, B., & Taurick, G. (1998). Differential transmission of the <i>Cucumis</i> organellar genomes. <i>Theoretical and Applied Genetics</i> , 97(1), 122-128.                                                                     |
| Paternal Inheritance | Mitochondria | Plants | <i>Cucumis sativus</i> (cucumber)                                                                                                              | Havey, M. J. (1997). Predominant paternal transmission of the mitochondrial genome in cucumber. <i>Journal of Heredity</i> , 88(3), 232-235.                                                                                                                        |
| Paternal Inheritance | Mitochondria | Plants | <i>Musa acuminata</i> (banana)                                                                                                                 | Fauré, S., Noyer, J. L., Carreel, F., Horry, J. P., Bakry, F., & Lanaud, C. (1994). Maternal inheritance of chloroplast genome and paternal inheritance of mitochondrial genome in bananas ( <i>Musa acuminata</i> ). <i>Current Genetics</i> , 25(3), 265-269.     |

|                      |              |        |                                               |                                                                                                                                                                                                                                             |
|----------------------|--------------|--------|-----------------------------------------------|---------------------------------------------------------------------------------------------------------------------------------------------------------------------------------------------------------------------------------------------|
| Paternal Inheritance | Mitochondria | Plants | <i>Sequoia sempervirens (coastal redwood)</i> | Neale, D. B., Marshall, K. A., & Sederoff, R. R. (1989). Chloroplast and mitochondrial DNA are paternally inherited in <i>Sequoia sempervirens</i> D. Don Endl. <i>Proceedings of the National Academy of Sciences</i> , 86(23), 9347-9349. |
| Paternal Leakage     | Chloroplasts | Plants | <i>Acacia decurrens</i>                       | Tilney-Basset, R. A. E. (1978). The inheritance and behaviour of plastids.                                                                                                                                                                  |
| Paternal Leakage     | Chloroplasts | Plants | <i>Acacia mearnsii</i>                        | Tilney-Basset, R. A. E. (1978). The inheritance and behaviour of plastids.                                                                                                                                                                  |
| Paternal Leakage     | Chloroplasts | Plants | <i>Antirrhinum majus</i>                      | Diers, L. (1971). Übertragung von Plastiden durch den Pollen bei <i>Antirrhinum majus</i> . <i>Molecular and General Genetics MGG</i> , 113(2), 150-153.                                                                                    |
| Paternal Leakage     | Chloroplasts | Plants | <i>Antirrhinum majus</i>                      | Reboud, X., & Zeyl, C. (1994). Organelle inheritance in plants. <i>Heredity</i> , 72(2), 132-140.                                                                                                                                           |
| Paternal Leakage     | Chloroplasts | Plants | <i>Borago officinalis</i>                     | Sears, B. B. (1980). Elimination of plastids during spermatogenesis and fertilization in the plant kingdom. <i>Plasmid</i> , 4(3), 233-255.                                                                                                 |
| Paternal Leakage     | Chloroplasts | Plants | <i>Brassicaceae</i>                           | Schneider, A., Stelljes, C., Adams, C., Kirchner, S., Burkhard, G., Jarzombski, S., ... & Koop, H. U. (2015). Low frequency paternal transmission of plastid genes in Brassicaceae. <i>Transgenic research</i> , 24(2), 267-277.            |
| Paternal Leakage     | Chloroplasts | Plants | <i>Browallia speciosa</i>                     | Sears, B. B. (1980). Elimination of plastids during spermatogenesis and fertilization in the plant kingdom. <i>Plasmid</i> , 4(3), 233-255.                                                                                                 |
| Paternal Leakage     | Chloroplasts | Plants | <i>Browallia speciosa</i>                     | Reboud, X., & Zeyl, C. (1994). Organelle inheritance in plants. <i>Heredity</i> , 72(2), 132-140.                                                                                                                                           |
| Paternal Leakage     | Chloroplasts | Plants | <i>Chenopodium album</i>                      | Gasquez, J., Mouemar, A. A., & Darmency, H. (1985). Triazine herbicide resistance in <i>Chenopodium album</i> L.: occurrence and characteristics of an intermediate biotype. <i>Pesticide science</i> , 16(4), 392-396.                     |
| Paternal Leakage     | Chloroplasts | Plants | <i>Chlorophytum elatum</i>                    | Tilney-Basset, R. A. E. (1978). The inheritance and behaviour of plastids.                                                                                                                                                                  |
| Paternal Leakage     | Chloroplasts | Plants | <i>Chlorophytumc omosum</i>                   | Tilney-Basset, R. A. E. (1978). The inheritance and behaviour of plastids.                                                                                                                                                                  |
| Paternal Leakage     | Chloroplasts | Plants | <i>Cicer arietinum</i>                        | Corriveau, J. L., & Coleman, A. W. (1988). Rapid screening method to detect potential biparental inheritance of plastid DNA and results for over 200 angiosperm species. <i>American Journal of Botany</i> , 75(10), 1443-1458.             |
| Paternal Leakage     | Chloroplasts | Plants | <i>Epilobium angustifolium</i>                | Reboud, X., & Zeyl, C. (1994). Organelle inheritance in plants. <i>Heredity</i> , 72(2), 132-140.                                                                                                                                           |
| Paternal Leakage     | Chloroplasts | Plants | <i>Fagopyrum esculentum</i>                   | Sears, B. B. (1980). Elimination of plastids during spermatogenesis and fertilization in the plant kingdom. <i>Plasmid</i> , 4(3), 233-255.                                                                                                 |
| Paternal Leakage     | Chloroplasts | Plants | <i>Hypericum perforatum</i>                   | Corriveau, J. L., & Coleman, A. W. (1988). Rapid screening method to detect potential biparental inheritance of plastid DNA and results for over 200 angiosperm species. <i>American Journal of Botany</i> , 75(10), 1443-1458.             |
| Paternal Leakage     | Chloroplasts | Plants | <i>Impatiens glandulifera</i>                 | Richter-Landmann, W. (1959). Der Befruchtungsvorgang bei <i>Impatiens glandulifera</i> royle unter Berücksichtigung der plasmatischen Organelle von Spermazelle, Eizelle und Zygote. <i>Planta</i> , 53(3), 162-177.                        |

|                      |              |               |                                                                       |                                                                                                                                                                                                                                                               |
|----------------------|--------------|---------------|-----------------------------------------------------------------------|---------------------------------------------------------------------------------------------------------------------------------------------------------------------------------------------------------------------------------------------------------------|
| Paternal Leakage     | Chloroplasts | Plants        | <i>Ipomoea nil</i>                                                    | Corriveau, J. L., & Coleman, A. W. (1988). Rapid screening method to detect potential biparental inheritance of plastid DNA and results for over 200 angiosperm species. <i>American Journal of Botany</i> , 75(10), 1443-1458.                               |
| Paternal Leakage     | Chloroplasts | Plants        | <i>Nicotiana tabacum</i> ; <i>N. plumbaginifoli</i> (tobacco cybrids) | Medgyesy, P., Páy, A., & Márton, L. (1986). Transmission of paternal chloroplasts in <i>Nicotiana</i> . <i>Molecular and General Genetics MGG</i> , 204(2), 195-198.                                                                                          |
| Paternal Leakage     | Chloroplasts | Plants        | <i>Oryza sativa</i>                                                   | Dally, A. M., & Second, G. (1990). Chloroplast DNA diversity in wild and cultivated species of rice (Genus <i>Oryza</i> , section <i>Oryza</i> ). Cladistic-mutation and genetic-distance analysis. <i>Theoretical and Applied Genetics</i> , 80(2), 209-222. |
| Paternal Leakage     | Chloroplasts | Plants        | <i>Pisum sativum</i>                                                  | Corriveau, J. L., & Coleman, A. W. (1988). Rapid screening method to detect potential biparental inheritance of plastid DNA and results for over 200 angiosperm species. <i>American Journal of Botany</i> , 75(10), 1443-1458.                               |
| Paternal Leakage     | Chloroplasts | Plants        | <i>Poa annua</i>                                                      | Darmency, H., & Gasquez, J. (1981). Inheritance of triazine resistance in <i>Poa annua</i> : consequences for population dynamics. <i>New Phytologist</i> , 89(3), 487-493.                                                                                   |
| Paternal Leakage     | Chloroplasts | Plants        | <i>Solanum tuberosum</i> (potato)                                     | Sears, B. B. (1980). Elimination of plastids during spermatogenesis and fertilization in the plant kingdom. <i>Plasmid</i> , 4(3), 233-255.                                                                                                                   |
| Paternal Leakage     | Mitochondria | Plants        | <i>Brassica napus</i>                                                 | Erickson, L., & Kemble, R. (1993). The effect of genotype on pollen transmission of mitochondria in rapeseed ( <i>Brassica napus</i> ). <i>Sexual Plant Reproduction</i> , 6(1), 33-39.                                                                       |
| Paternal Leakage     | Mitochondria | Plants        | <i>Daucus carota</i>                                                  | Mandel, J. R., Ramsey, A. J., Holley, J. M., Scott, V. A., Mody, D., & Abbot, P. (2020). Disentangling complex inheritance patterns of plant organellar genomes: an example from carrot. <i>Journal of Heredity</i> , 111(6), 531-538.                        |
| Paternal Leakage     | Mitochondria | Plants        | <i>Pinus banksiana</i> (jack pine)                                    | Wagner, D. B., Dong, J., Carlson, M. R., & Yanchuk, A. D. (1991). Paternal leakage of mitochondrial DNA in <i>Pinus</i> . <i>Theoretical and Applied Genetics</i> , 82(4), 510-514.                                                                           |
| Paternal Leakage     | Mitochondria | Plants        | <i>Pinus contorta</i> (lodgepole pine)                                | Wagner, D. B., Dong, J., Carlson, M. R., & Yanchuk, A. D. (1991). Paternal leakage of mitochondrial DNA in <i>Pinus</i> . <i>Theoretical and Applied Genetics</i> , 82(4), 510-514.                                                                           |
| Paternal Leakage     | Mitochondria | Plants        | <i>Silene vulgaris</i>                                                | McCauley, D. E., Bailey, M. F., Sherman, N. A., & Darnell, M. Z. (2005). Evidence for paternal transmission and heteroplasmy in the mitochondrial genome of <i>Silene vulgaris</i> , a gynodioecious plant. <i>Heredity</i> , 95(1), 50-58.                   |
| Paternal Inheritance | Mitochondria | Viridiplantae | <i>Chlamydomonas reinhardtii</i>                                      | Nakamura, S. (2010). Paternal inheritance of mitochondria in <i>Chlamydomonas</i> . <i>Journal of plant research</i> , 123(2), 163-170.                                                                                                                       |
| Tertiary Parent      | Mitochondria | Amoebozoa     | <i>Dictyostelium discoideum</i>                                       | Bloomfield, G., Paschke, P., Okamoto, M., Stevens, T. J., Urushihara, H. (2019) Triparental inheritance in <i>Dictyostelium</i> . <i>PNAS</i> , 116:2187–2192                                                                                                 |
